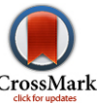

# Mathematical Modeling of Interleukin-35 Promoting Tumor Growth and Angiogenesis

Kang-Ling Liao<sup>1\*</sup>, Xue-Feng Bai<sup>2</sup>, Avner Friedman<sup>1,3</sup>

**1** Mathematical Biosciences Institute, The Ohio State University, Columbus, Ohio, United States of America, **2** Department of Pathology and Comprehensive Cancer Center, The Ohio State University, Columbus, Ohio, United States of America, **3** Department of Mathematics, The Ohio State University, Columbus, Ohio, United States of America

## Abstract

Interleukin-35 (IL-35), a cytokine from the Interleukin-12 cytokine family, has been considered as an anti-inflammatory cytokine which promotes tumor progression and tumor immune evasion. It has also been demonstrated that IL-35 is secreted by regulatory T cells. Recent mouse experiments have shown that IL-35 produced by cancer cells promotes tumor growth via enhancing myeloid cell accumulation and angiogenesis, and reducing the infiltration of activated CD8<sup>+</sup> T cells into tumor microenvironment. In the present paper we develop a mathematical model based on these experimental results. We include in the model an anti-IL-35 drug as treatment. The extended model (with drug) is used to design protocols of anti-IL-35 injections for treatment of cancer. We find that with a fixed total amount of drug, continuous injection has better efficacy than intermittent injections in reducing the tumor load while the treatment is ongoing. We also find that the percentage of tumor reduction under anti-IL-35 treatment improves when the production of IL-35 by cancer is increased.

**Citation:** Liao K-L, Bai X-F, Friedman A (2014) Mathematical Modeling of Interleukin-35 Promoting Tumor Growth and Angiogenesis. PLoS ONE 9(10): e110126. doi:10.1371/journal.pone.0110126

**Editor:** Raffaele A Calogero, University of Torino, Italy

**Received:** April 8, 2014; **Accepted:** September 17, 2014; **Published:** October 30, 2014

**Copyright:** © 2014 Liao et al. This is an open-access article distributed under the terms of the Creative Commons Attribution License, which permits unrestricted use, distribution, and reproduction in any medium, provided the original author and source are credited.

**Data Availability:** The authors confirm that all data underlying the findings are fully available without restriction. All relevant data are within the paper.

**Funding:** This work is supported, in part, by the National Science Council of Taiwan, R. O. C. (<http://web1.nsc.gov.tw/>) under No. NSC 101-2917-I-564-062, the National Science Foundation, Division of Mathematical Sciences (<http://www.nsf.gov/>) under Agreement DMS. 0931642, the National Cancer Institute (<http://www.cancer.gov/>) under R01CA138427, and American Cancer Society (<http://www.cancer.org/>) under RSG-09-188-01-LIB. The funders had no role in study design, data collection and analysis, decision to publish, or preparation of the manuscript.

**Competing Interests:** The authors have declared that no competing interests exist.

\* Email: [liao.92@mbi.osu.edu](mailto:liao.92@mbi.osu.edu)

## Introduction

Interleukin-35 (IL-35) is a member of the IL-12 cytokine family. It is produced in human cancer tissues such as in melanoma, B cell lymphoma [1], lung cancer, colon cancer, esophageal carcinoma, hepatocellular carcinoma, cervical carcinoma, and colorectal cancer [2,3], and it plays important roles in tumor progression and tumor immune evasion [1]. Fox3<sup>+</sup> regulatory T cells (T<sub>reg</sub>) are common in tumor microenvironment [4,5], where they induce immune-suppression. They do so by producing various cytokines, including TGF- $\beta$ , IL-10 [6], and IL-9 [7], thereby promoting tumor growth. It was also shown that T<sub>reg</sub> secrete IL-35 [8–14]. IL-35 functions through IL-35R on various cell types, and is a potent immune-suppressor. Indeed, T<sub>reg</sub>-derived IL-35 was shown to inhibit antitumor T cell response [15], whereas IL-35-deficient T<sub>reg</sub> have significantly reduced activity *in vitro* and *in vivo* [8]. Stable expression of EB13, a gene that codes for IL-35 subunit, confers growth-promoting activity in lung cancer, whereas small interfering RNA silencing of EB13 inhibits proliferation of lung cancer [16].

Recently Wang et al. [1] generated IL-35 producing plasmacytoma cancer cells and showed that the expression of IL-35 in tumor microenvironment increased the number of myeloid derived suppressor cells (MDSCs), and promoted tumor angiogenesis; furthermore, IL-35 inhibited the infiltration of cytotoxic T lymphocytes into the tumor microenvironment and rendered the cancer cells less susceptible to CTL destruction.

These experimental results suggest that blocking IL-35 may be an effective therapeutic approach to human cancer. To explore this possibility we develop in the present paper a mathematical model and then conduct *in silico* experiments to evaluate to what extent blocking IL-35 reduces tumor growth.

The model consists of a system of partial differential equations (PDEs) that involve interactions among cells (tumor cells, MDSCs, T cells, T<sub>reg</sub>s, endothelial cells) and cytokines (M-CSF, TGF- $\beta$ , VEGF, IL-35). We first consider the situation which corresponds to the experiments in Wang et al. [1]. In these experiments two kinds of plasmacytoma cells were injected into wild type mice: tumor cells that have been transfected with IL-35 (J558-IL-35) so that tumor secretes high amount of IL-35 into the microenvironment, and “normal” plasmacytoma cells (J558-Ctrl) that secrete very small amount of IL-35. There is also a small amount of IL-35 produced by MDSC [17,18] as well as IL-35 produced by T<sub>reg</sub> [8–14]. We show that the model simulations agree with the experimental data in [1]. We also introduce, in this model, the effect of a drug which inhibits production of IL-35, and simulate various protocols for administering the drug. We find, that administering the drug frequently in small amounts yields better results than administering it infrequently in larger amounts. We also find that the percentage of tumor reduction under anti-IL-35 drug improves when the production of IL-35 by cancer is increased.

**Results**

**Mathematical model**

The mathematical model is based on the network schematically shown in Figure 1. Cancer cells secrete M-CSF which attracts MDSCs; cancer cells and MDSCs secrete VEGF which triggers angiogenesis by attracting endothelial cells and enhancing their proliferation. The additional roles of MDSC are described in the caption of Figure 1. In particular, MDSC, inhibits the activation  $CD8^+$  T cells via IL-10 and a variety of other mechanisms.

As mentioned in the Introduction, Wang et al. [1] considered two kinds of tumor cells injected into mice: J558-IL-35 and J558-Ctrl. In the case of J558-IL-35, IL-35 is produced mostly by tumor cells, less by  $T_{reg}$ , and little by MDSC. In the case of J558-Ctrl, cancer cells produce very small amount of IL-35 so that IL-35 mainly comes from  $T_{reg}$  and MDSC. MDSC secretes TGF- $\beta$  and IL-10 which promote  $T_{reg}$  [19,20], and there is a positive feedback loop

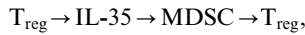

where the last activation is activated by TGF- $\beta$  and IL-10.

We use the network described in Figure 1 to construct a system of partial differential equations. In order to simplify the computations we assume that the tumor and all the variables are radially symmetric. The variables of the model and their dimension are listed below.

- $c(r,t)$  : tumor cell density,  $cell/cm^3$ ,
- $q(r,t)$  : M-CSF concentration,  $pg/cm^3$ ,
- $M(r,t)$  : Myeloid derived suppressor cell (MDSC) density,  $cell/cm^3$ ,
- $I_{35}(r,t)$  : Interleukin - 35 concentration,  $pg/cm^3$ ,
- $R(r,t)$  : regulatory T cell density,  $cell/cm^3$ ,
- $I_{\beta}(r,t)$  : TGF- $\beta$  concentration,  $pg/cm^3$ ,
- $T(r,t)$  : T cell density,  $cell/cm^3$ ,
- $h(r,t)$  : VEGF concentration,  $pg/cm^3$ ,
- $e(r,t)$  : endothelial cell (EC) density,  $cell/cm^3$ ,
- $w(r,t)$  : oxygen concentration,  $pg/cm^3$ .

We proceed to write down the differential equation of each of the variables. Most of the parameters are taken from the literatures, as indicated; in Methods we explain how the remaining parameters were estimated.

**Tumor cell (c).** The density  $c(r,t)$  of tumor cells satisfies the following equation:

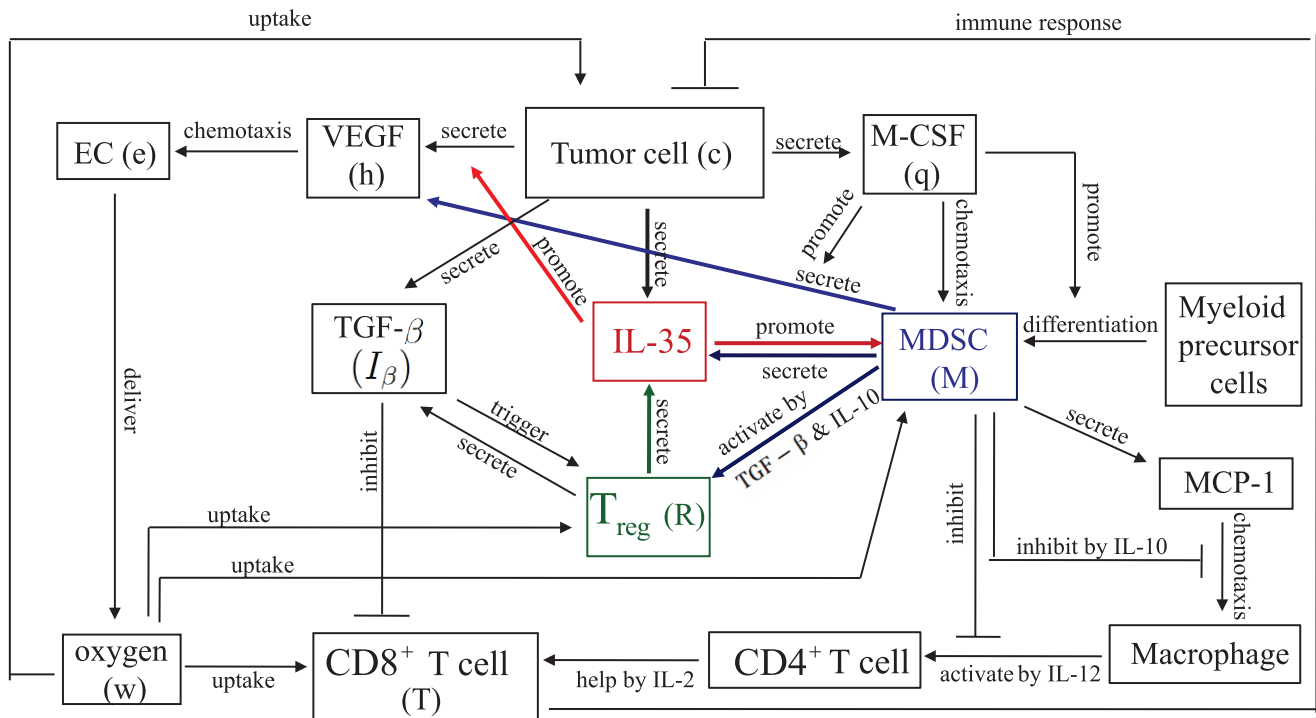

**Figure 1. A network showing how IL-35 promotes tumor growth.** M-CSF secreted by tumor cells promotes the differentiation of myeloid cells to MDSCs. M-CSF also attracts MDSCs to the tumor microenvironment by chemotaxis and promotes the secretion of VEGF by MDSCs. VEGF secreted by tumor cells and MDSCs attracts endothelial cells to trigger angiogenesis. IL-35 secreted by tumor cells, regulatory T cells and MDSCs promotes the secretion of VEGF by tumor cells and enhances the production of MDSCs. MDSCs promote  $T_{reg}$ s, but also secrete MCP-1 to attract macrophages into the tumor microenvironment. Macrophages secrete IL-12 to activate  $CD4^+$  T cells, and  $CD4^+$  T cells secrete IL-2 which activates  $CD8^+$  T cells. MDSCs also produce large amount of IL-10, which inhibits the chemotaxis and activation of  $CD4^+$  T cells.  
doi:10.1371/journal.pone.0110126.g001

**Table 1.** Parameters for the tumor cell equation.

| Parameter   | Description                                | Dimensional                                                 | Reference              |
|-------------|--------------------------------------------|-------------------------------------------------------------|------------------------|
| $D_c$       | Diffusion coefficient of tumor cells       | $4.32 \times 10^{-6} \text{ cm}^2/\text{day}$               | [22,25] & estimated    |
| $c^*$       | Carrying capacity of tumor cells           | $10^9 \text{ cell}/\text{cm}^3$                             | [22,47,55]             |
| $\mu_c$     | Apoptosis rate of tumor cell               | $4.15 \times 10^{-1}/\text{day}$                            | [22,66]                |
| $\eta_c$    | Killing rate of tumor cells from T cells   | $3.1574 \times 10^{-6} \text{ cm}^3/\text{cell}/\text{day}$ | [55,56] & estimated    |
| $\lambda_1$ | Maximal proliferation rate of tumor cells  | $2.5/\text{day}$                                            | [22,25,67] & estimated |
| $\lambda_2$ | Maximal necrosis rate of tumor cells       | $8.3 \times 10^{-1}/\text{day}$                             | [22,25,55,67]          |
| $w_n$       | Lower bound of oxygen in necrotic          | $3.57 \times 10^7 \text{ pg}/\text{cm}^3$                   | [22,68]                |
| $w_h$       | Lower bound of oxygen in extremely hypoxic | $10^8 \text{ pg}/\text{cm}^3$                               | [22,55,68]             |
| $w_0$       | Normal oxygen level                        | $4.65 \times 10^8 \text{ pg}/\text{cm}^3$                   | [22,68]                |

doi:10.1371/journal.pone.0110126.t001

$$\frac{\partial c}{\partial t} = \underbrace{D_c \frac{1}{r^2} \frac{\partial}{\partial r} \left( r^2 \frac{\partial c}{\partial r} \right)}_{\text{diffusion}} + \underbrace{\lambda_1(w)c \left( 1 - \frac{c}{c^*} \right)}_{\text{proliferation}} - \underbrace{\lambda_2(w)c}_{\text{death by necrosis}} - \underbrace{\mu_c c}_{\text{apoptosis}} - \underbrace{\eta_c T c}_{\text{killed by T cell}}, \tag{1}$$

where

$$\lambda_1(w) = \begin{cases} 0 & \text{if } w < w_h, \\ \lambda_1(w - w_h)/(w_0 - w_h) & \text{if } w_h \leq w \leq w_0, \\ \lambda_1 & \text{if } w > w_0, \end{cases}$$

$$\lambda_2(w) = \begin{cases} \lambda_2 & \text{if } w < w_n, \\ \lambda_2(w_h - w)/(w_h - w_n) & \text{if } w_n \leq w \leq w_h, \\ 0 & \text{if } w > w_h; \end{cases}$$

$w_0$  is the oxygen level in healthy tissue, and the levels of oxygen for necrotic, extremely hypoxic, and intermediate hypoxic states vary in the intervals  $[0, w_n]$ ,  $(w_n, w_h)$  and  $(w_h, w_0)$ , respectively.

The first term on the right-hand side of Equation (1) represents the dispersion (or diffusion) of tumor cells with diffusion coefficient  $D_c$ . The second term accounts for the tumor proliferation, which depends on the concentration of oxygen  $w(r, t)$  and tissue carrying capacity  $c^*$ . The third and fourth terms represent the death of tumor cells by necrosis and apoptosis, respectively. The last term accounts for the killing of tumor cells by activated CD8<sup>+</sup> T cells [21]. The parameters in Equation (1) are listed in Table 1.

**M-CSF (q).** The concentration of M-CSF is given by the equation:

$$\frac{\partial q}{\partial t} = \underbrace{D_q \frac{1}{r^2} \frac{\partial}{\partial r} \left( r^2 \frac{\partial q}{\partial r} \right)}_{\text{diffusion}} + \underbrace{\alpha_q c}_{\text{production by tumor}} - \underbrace{\mu_q q}_{\text{decay}}. \tag{2}$$

The first term on the right-hand side is the diffusion of M-CSF with coefficient  $D_q$ . The second term represents the M-CSF secreted by tumor cells [19,22], and the last term is the decay of M-CSF. The parameters in Equation (2) are listed in Table 2.

**Myeloid derived suppressor cell (MDSC) (M).** We model the dynamics of the density of MDSC by

$$\frac{\partial M}{\partial t} = \underbrace{\sigma_0}_{\text{source}} + \underbrace{\sigma_1 M_0 \times \frac{I_{35}}{I_{35} + c_M}}_{\text{induction of myeloid cells by } I_{35}} + \underbrace{D_M \frac{1}{r^2} \frac{\partial}{\partial r} \left( r^2 \frac{\partial M}{\partial r} \right)}_{\text{diffusion}} - \underbrace{\frac{1}{r^2} \frac{\partial}{\partial r} \left( r^2 k_q M \frac{\partial q}{\partial r} \right)}_{\text{chemotaxis by M-CSF}} + \underbrace{\alpha_M \frac{q M_0}{\sigma_M + q}}_{\text{differentiation from myeloid cells}} - \underbrace{\mu_M M}_{\text{death}}. \tag{3}$$

The first and last terms on the right-hand side account for the source and death of MDSCs. MDSCs undergo dispersion as well as chemotaxis driven by M-CSF (the third and fourth terms) [23–25]. It was reported in [1], that MDSCs do not undergo chemotaxis by IL-35 *in vitro* experiments. However, it has been observed that differentiation of MDSCs from myeloid precursor cells is enhanced by IL-35, although the mechanism is currently unknown [1]. We assume that this mechanism results in the second term on the right-hand side of Equation (3). The fifth term accounts for the differentiation of MDSCs from myeloid cells promoted by M-CSF [26]. The parameters in Equation (3) are listed in Table 3.

**IL-35 ( $I_{35}$ ).** The equation for the concentration of IL-35 is the following:

$$\frac{\partial I_{35}}{\partial t} = \underbrace{D_{I_{35}} \frac{1}{r^2} \frac{\partial}{\partial r} \left( r^2 \frac{\partial I_{35}}{\partial r} \right)}_{\text{diffusion}} + \underbrace{\alpha_{35} c}_{\text{production by tumor}} + \underbrace{\beta_{35} R}_{\text{production by } T_{\text{reg}}} - \underbrace{\gamma_{35} M}_{\text{production by MDSC}} - \underbrace{\mu_{35} I_{35}}_{\text{decay}}. \tag{4}$$

Experiments indicate that IL-35 can be produced by  $T_{\text{reg}}$ S [8–14]. IL-35 possesses EBI3 and IL-12p35 subunits [1,11,13,14,27]. In human model, it has been shown that EBI3 was expressed in tumor infiltrating dendritic cells [17,18], which is a subpopulation of MDSCs, and in lung cancer cells [2,3,16], whereas IL-12p35 was detected in EBI3<sup>+</sup> tumor cells [17,18]. Hence, cancer cells

**Table 2.** Parameters for the M-CSF equation.

| Parameter  | Description                            | Dimensional                                               | Reference        |
|------------|----------------------------------------|-----------------------------------------------------------|------------------|
| $D_q$      | Diffusion coefficient of M-CSF         | $1.728 \times 10^{-1} \text{ cm}^2/\text{day}$            | [22,25,55,69,70] |
| $\alpha_q$ | Production rate of M-CSF by tumor cell | $2.7648 \times 10^{-5} \text{ pg}/\text{cell}/\text{day}$ | [22,55,71,72]    |
| $\mu_q$    | Decay rate of M-CSF                    | $4.1472/\text{day}$                                       | [22,73]          |

doi:10.1371/journal.pone.0110126.t002

and MDSCs could be other sources of IL-35 in human and mouse cancer. Accordingly, we include the production of IL-35 by cancer cells (the second term),  $T_{\text{reg}s}$  (the third term), and MDSCs (the fourth term). For J558-IL-35 mouse model, we take  $\alpha_{35}$  large enough and  $\gamma_{35}$  small enough such that, in our simulations,  $\alpha_{35}c$  is relatively much larger than  $\beta_{35}R$ , and  $\gamma_{35}M$  is significantly smaller than  $\beta_{35}R$ . On the other hand, in the J558-Ctrl mouse model, we modify  $\alpha_{35}$  to be a much smaller than the value in J558-IL-35 case so that the production of IL-35 by tumor cells is significantly smaller than the productions of IL-35 by  $T_{\text{reg}s}$  and MDSCs. The parameters in Equation (4) are listed in Table 4.

**Regulatory T cell (R).** The equation for the density of regulatory T cells is given by

$$\frac{\partial R}{\partial t} = \underbrace{D_R \frac{1}{r^2} \frac{\partial}{\partial r} \left( r^2 \frac{\partial R}{\partial r} \right)}_{\text{diffusion}} + \underbrace{\delta_M \frac{M}{M + \sigma_R}}_{\text{(indirect) activation by MDSC}} + \underbrace{\delta_\beta \frac{I_\beta}{I_\beta + \sigma_\beta}}_{\text{activation by TGF-}\beta} - \underbrace{\mu_R R}_{\text{death}} \quad (5)$$

$T_{\text{reg}}$  is activated by TGF- $\beta$  (the third term on the right-hand side) and by IL-10. IL-10 is secreted by MDSC [19,20] and, for simplicity, we do not introduce IL-10 explicitly, and represent the activation of  $T_{\text{reg}}$  by IL-10 by the term  $\delta_M M / (M + \sigma_R)$ . The parameters in Equation (5) are listed in Table 5.

**TGF- $\beta$  ( $I_\beta$ ).** The equation for the concentration of TGF- $\beta$  is the following:

$$\frac{\partial I_\beta}{\partial t} = \underbrace{D_\beta \frac{1}{r^2} \frac{\partial}{\partial r} \left( r^2 \frac{\partial I_\beta}{\partial r} \right)}_{\text{diffusion}} + \underbrace{v_c c}_{\text{production by tumor}} + \underbrace{v_R R}_{\text{production by Treg}} - \underbrace{\mu_\beta I_\beta}_{\text{decay}} \quad (6)$$

TGF- $\beta$  is secreted by tumor cells (second term) [28–35] and  $T_{\text{reg}s}$  (third term) [36–38]. The parameters in Equation (6) are shown in Table 6.

**Activated CD8<sup>+</sup> T cell (T).** Cytotoxic T cells (CTL), or CD8<sup>+</sup> T cells, satisfy the equation:

$$\frac{\partial T}{\partial t} = \underbrace{D_T \frac{1}{r^2} \frac{\partial}{\partial r} \left( r^2 \frac{\partial T}{\partial r} \right)}_{\text{diffusion}} + \underbrace{\frac{s_M}{s_M + a_1 M}}_{\text{inhibition}} \times \left[ - \underbrace{\frac{1}{r^2} \frac{\partial}{\partial r} \left( r^2 \beta_1 T \frac{\partial (a_2 M)}{\partial r} \right)}_{\text{(indirect) chemotaxis by MCP-1}} + \underbrace{\frac{\beta_2 (a_3 M)}{(a_3 M) + c_5}}_{\text{(indirect) activation}} \times \underbrace{\frac{s_\beta}{s_\beta + I_\beta}}_{\text{inhibit by } I_\beta} \right] - \underbrace{\mu_T T}_{\text{death}} \quad (7)$$

MDSC secretes MCP-1 which exerts chemotactic force on macrophages [39,40], while macrophages secrete IL-12 which

**Table 3.** Parameters for the MDSC equation.

| Parameter  | Description                          | Dimensional                                               | Reference           |
|------------|--------------------------------------|-----------------------------------------------------------|---------------------|
| $\sigma_0$ | Source of MDSC                       | $1.10345 \times 10^5 \text{ cell}/\text{cm}^3/\text{day}$ | [56,58] & estimated |
| $\sigma_1$ | Maximal production rate via $I_{35}$ | $4.65518 \times 10^2/\text{day}$                          | [1] & estimated     |
| $c_M$      |                                      | $10^5 \text{ pg}/\text{cm}^3$                             | estimated           |
| $D_M$      | Diffusion coefficient of MDSC        | $4.32 \times 10^{-6} \text{ cm}^2/\text{day}$             | [22,25] & estimated |
| $k_q$      | Chemotaxis rate of MDSC for M-CSF    | $5.2 \times 10^{-7} \text{ cm}^5/\text{pg}/\text{day}$    | [25,55]             |
| $\alpha_M$ | Polarization rate of MDSC by M-CSF   | $7.5 \times 10^{-1}/\text{day}$                           | [56] & estimated    |
| $M_0$      | Density of myeloid precursor cells   | $8 \times 10^3 \text{ cell}/\text{cm}^3$                  | [56,58]             |
| $\sigma_M$ |                                      | $7.5 \times 10 \text{ pg}/\text{cm}^3$                    | [56,58]             |
| $\mu_M$    | Death rate of MDSC                   | $3 \times 10^{-2}/\text{day}$                             | [58,59]             |

doi:10.1371/journal.pone.0110126.t003

**Table 4.** Parameters for the IL-35 equation.

| Parameter     | Description                                | Dimensional                                        | Reference             |
|---------------|--------------------------------------------|----------------------------------------------------|-----------------------|
| $D_{I_{35}}$  | Diffusion coefficient of $I_{35}$          | $1.25 \times 10^{-3} \text{ cm}^2/\text{day}$      | [60] & estimated      |
| $\alpha_{35}$ | Production rate of $I_{35}$ from tumor     | $10^{-3} \text{ pg/cell/day}$ for J558-IL-35 mouse | [1,16–18] & estimated |
| $\alpha_{35}$ | Production rate of $I_{35}$ from tumor     | $10^{-7} \text{ pg/cell/day}$ for J558-Ctrl mouse  | [1] & estimated       |
| $\beta_{35}$  | Production rate of $I_{35}$ from $T_{reg}$ | $1.67 \times 10^{-3} \text{ pg/cell/day}$          | [34] & estimated      |
| $\gamma_{35}$ | Production rate of $I_{35}$ from MDSC      | $10^{-4} \text{ pg/cell/day}$                      | [17,18] & estimated   |
| $\mu_{35}$    | Decay rate of $I_{35}$                     | $2/\text{day}$                                     | [61–63] & estimated   |

doi:10.1371/journal.pone.0110126.t004

activates  $CD4^+$  T cells [41] and  $CD4^+$  T cells produce IL-2 [42,43] which activates  $CD8^+$  T cells. The activation of  $CD8^+$  T cells is inhibited by  $TGF-\beta$  [44–46]. For simplicity we combine all these process by attributing the chemotactic force or  $CD8^+$  T cells and activation source of  $CD8^+$  T cells to MDSC (the terms in square brackets in Equation (7)). The factor  $s_M/(s_M + a_1M)$  represents the fact that MDSC suppresses  $CD8^+$  T cells proliferation by amino acid metabolism. The parameters in Equation (7) are listed in Table 7.

**VEGF (h).** The concentration of VEGF evolves according to the equation

$$\frac{\partial h}{\partial t} = \underbrace{D_h \frac{1}{r^2} \frac{\partial}{\partial r} \left( r^2 \frac{\partial h}{\partial r} \right)}_{\text{diffusion}} + \underbrace{\lambda_5(w)c \times \frac{I_{35} + k_1}{I_{35} + \sigma_h}}_{\text{production by tumor promoted by } I_{35}} + \underbrace{\lambda_6(w)M \times \frac{q + k_2}{q + q_0}}_{\text{production by MDSC}} - \underbrace{\mu_h h}_{\text{decay}}, \tag{8}$$

where  $\lambda_5(w) = \lambda_5 \phi(w)$  and  $\lambda_6(w) = \lambda_6 \phi(w)$  depend on the oxygen concentration  $w$ , as follows:

$$\phi(w) = \begin{cases} 0 & \text{if } w < w_n, \\ \frac{\exp(10(w - w_n)) - 1}{\exp(10(w^* - w_n)) - 1} & \text{if } w_n \leq w < w^*, \\ 1 - 0.7(w - w^*)/(w_0 - w^*) & \text{if } w^* \leq w \leq w_0, \\ 0.3 & \text{if } w > w_0, \end{cases}$$

and  $w^* \in (w_n, w_0)$  is the threshold at which the hypoxic effect on VEGF production by tumor cells and MDSCs is maximal. The function  $\phi(w)$  is chosen such that tumor cells and MDSCs can

secrete VEGF under mild hypoxic conditions. The second term on the right-hand side of Equation (8) represents the VEGF produced by tumor cells and enhanced by  $I_{35}$  [1], and the third term accounts for VEGF produced by MDSCs and enhanced by M-CSF [47]; accordingly, the ratios  $k_1/\sigma_h$  and  $k_2/q_0$  should be small. The parameters in Equation (8) are listed in Table 8.

**Endothelial cell (EC) (e).** The equation of the density of EC includes dispersion, chemotaxis by VEGF, and proliferation by VEGF:

$$\frac{\partial e}{\partial t} = \underbrace{D_e \frac{1}{r^2} \frac{\partial}{\partial r} \left( r^2 \frac{\partial e}{\partial r} \right)}_{\text{diffusion}} - \underbrace{\frac{1}{r^2} \frac{\partial}{\partial r} \left( r^2 k_h e \frac{\partial h}{\partial r} \right)}_{\text{chemotaxis by VEGF}} + \underbrace{\lambda_{12} e \left( 1 - \frac{e}{e_1} \right) \frac{h - h_1}{h_0} H(h - h_1)}_{\text{proliferation}}. \tag{9}$$

Here  $e_1$  is the maximal density of EC inside the tumor, and  $H(\cdot)$  is defined by

$$H(h - h_1) = \begin{cases} 1 & \text{if } h \geq h_1 \\ 0 & \text{if } h < h_1. \end{cases}$$

The last term, taken from [22], reflects the fact that VEGF induces proliferation of EC when the concentration of VEGF is higher than the threshold  $h_1$ . The parameters in Equation (9) are given in Table 9.

**Oxygen (w).** We model the concentration of oxygen by the equation:

**Table 5.** Parameters for the  $T_{reg}$  equation.

| Parameter      | Description                                         | Dimensional                                      | Reference           |
|----------------|-----------------------------------------------------|--------------------------------------------------|---------------------|
| $D_R$          | Diffusion coefficient of $T_{reg}$                  | $4.32 \times 10^{-6} \text{ cm}^2/\text{day}$    | [22,25] & estimated |
| $\delta_M$     | Maximal activation rate of $T_{reg}$ by MDSC        | $1.25 \times 10^6 \text{ cell/cm}^3/\text{day}$  | estimated           |
| $\sigma_R$     |                                                     | $10^7 \text{ cell/cm}^3$                         | estimated           |
| $\delta_\beta$ | Maximal activation rate of $T_{reg}$ by $TGF-\beta$ | $3.327 \times 10^6 \text{ cell/cm}^3/\text{day}$ | [38] & estimated    |
| $\sigma_\beta$ |                                                     | $2.4 \times 10^3 \text{ pg/cm}^3$                | [38,64] & estimated |
| $\mu_R$        | Death rate of $T_{reg}$                             | $10^{-1}/\text{day}$                             | [34,74,75]          |

doi:10.1371/journal.pone.0110126.t005

**Table 6.** Parameters for the TGF- $\beta$  equation.

| Parameter   | Description                                 | Dimensional                                   | Reference        |
|-------------|---------------------------------------------|-----------------------------------------------|------------------|
| $D_\beta$   | Diffusion coefficient of $I_\beta$          | $8.64 \times 10^{-2} \text{ cm}^2/\text{day}$ | [76]             |
| $v_c$       | Production rate of $I_\beta$ by tumor cells | $5.5 \times 10^{-6} \text{ pg/cell/day}$      | [34] & estimated |
| $v_R$       | Production rate of $I_\beta$ by $T_{reg}^S$ | $9 \times 10^{-7} \text{ pg/cell/day}$        | [34] & estimated |
| $\mu_\beta$ | Decay rate of $I_\beta$                     | $0.693/\text{day}$                            | [76]             |

doi:10.1371/journal.pone.0110126.t006

$$\frac{\partial w}{\partial t} = \underbrace{\lambda_7 e}_{\text{delivered by EC}} + \underbrace{D_w \frac{1}{r^2} \frac{\partial}{\partial r} \left( r^2 \frac{\partial w}{\partial r} \right)}_{\text{diffusion}} - \underbrace{\lambda_8 T w}_{\text{uptake by CD8}^+ \text{ T cell}} - \underbrace{\lambda_9 M w}_{\text{uptake by MDSC}} - \underbrace{\lambda_{10} R w}_{\text{uptake by T}_{reg}} - \underbrace{\lambda_{11} C w}_{\text{uptake by tumor}} \quad (10)$$

Oxygen is delivered by EC (the first term) and is taken up by  $CD8^+$  T cells (the third term), MDSCs (the fourth term),  $T_{reg}^S$  (the fifth term), and tumor cells (the last term). The parameters in Equation (10) are listed in Table 10.

We assume that the tumor is radially symmetric and is contained in a sphere  $0 \leq r \leq L$ , where  $L = 1.5 \text{ cm}$ .

We next introduce the initial and boundary conditions for each of the variables.

**Initial conditions.** We assume that the tumor cells are concentrated initially near  $r=0$ , and take

$$c(r,0) = \begin{cases} c_0(e^{-r/\epsilon} - e^{-L_0/\epsilon}) & \text{if } 0 \leq r \leq L_0 \\ 0 & \text{if } L_0 < r \leq L, \end{cases} \quad (11)$$

with a positive parameter  $\epsilon$ ,  $0 < \epsilon \leq 1$ , and scaling parameters  $c_0 = 7.2 \times 10^8 \text{ cell/cm}^3$  and  $L_0 = 0.5 \text{ cm}$ . Since M-CSF is secreted by tumor cells, we take the initial concentration of M-CSF to be similar to the density of tumor cells,

$$q(r,0) = \begin{cases} \frac{\alpha_q}{\mu_q} c_0(e^{-r/\epsilon} - e^{-L_0/\epsilon}) & \text{if } 0 \leq r \leq L_0 \\ 0 & \text{if } L_0 < r \leq L, \end{cases}$$

where the constant  $\alpha_q/\mu_q$  comes from the steady state equation for  $q$ .

Since tumor cells are concentrated at the center  $r=0$ , we assume that the MDSC is higher at the center and negligible near the boundary  $r=L$ ,

$$M(r,0) = \begin{cases} \frac{\sigma_0}{\mu_M} (e^{-r/\epsilon} - e^{-L_0/\epsilon}) & \text{if } 0 \leq r \leq L_0 \\ 0 & \text{if } L_0 < r \leq L, \end{cases}$$

where the constant  $\sigma_0/\mu_M$  comes from the steady state equation of Equation (3). We assume that initially there are no activated  $CD8^+$  T cells, and take

$$T(r,0) = 0 \text{ if } 0 \leq r \leq L.$$

The activation of  $T_{reg}^S$  and the productions of  $I_{35}$  and VEGF are triggered by tumor cells and MDSCs; accordingly, we take

$$R(r,0) = \begin{cases} \frac{\delta_M + \delta_\beta}{\mu_R} (e^{-r/\epsilon} - e^{-L_0/\epsilon}) & \text{if } 0 \leq r \leq L_0 \\ 0 & \text{if } L_0 < r \leq L, \end{cases}$$

$$I_{35}(r,0) = \begin{cases} I_{35}^0 (e^{-r/\epsilon} - e^{-L_0/\epsilon}) & \text{if } 0 \leq r \leq L_0 \\ 0 & \text{if } L_0 < r \leq L, \end{cases}$$

$$h(r,0) = \begin{cases} h_0 (e^{-r/\epsilon} - e^{-L_0/\epsilon}) & \text{if } 0 \leq r \leq L_0 \\ 0 & \text{if } L_0 < r \leq L, \end{cases}$$

and  $I_{35}^0 = 10^2 \text{ pg/cm}^3$ , and  $h_0 = 10^3 \text{ pg/cm}^3$ . Similarly,  $I_\beta$  is produced by tumor cells and  $T_{reg}^S$ , so accordingly we take

$$I_\beta(r,0) = \begin{cases} I_\beta^0 (e^{-r/\epsilon} - e^{-L_0/\epsilon}) & \text{if } 0 \leq r \leq L_0 \\ 0 & \text{if } L_0 < r \leq L, \end{cases}$$

where  $I_\beta^0 = 2.4 \times 10^3 \text{ pg/cm}^3$ .

Endothelial cells migrate into the tumor from the surrounding normal healthy tissue, so we take

$$e(r,0) = \begin{cases} e_0 e^{-(L_0-r)/\epsilon} & \text{if } 0 \leq r \leq L_0 \\ e_0 & \text{if } L_0 < r \leq L, \end{cases}$$

where  $e_0$  is the density of endothelial cell in normal healthy tissue. Finally, since endothelial cells represent capillaries through which oxygen is delivered, we prescribe

$$w(r,0) = \begin{cases} w_0 e^{-(L_0-r)/\epsilon} & \text{if } 0 \leq r \leq L_0 \\ w_0 & \text{if } L_0 < r \leq L, \end{cases}$$

where  $w_0$  is the oxygen concentration in normal healthy tissue.

**Boundary conditions.** Since we assume radial symmetry, the first  $r$ -derivative of each variable vanishes at  $r=0$ . We assume no-flux condition at  $r=L$  for all the variables except for the oxygen and endothelial cells, and we take



**Table 7.** Parameters for the CD8<sup>+</sup> T equation.

| Parameter | Description                          | Dimensional                                             | Reference           |
|-----------|--------------------------------------|---------------------------------------------------------|---------------------|
| $D_T$     | Diffusion coefficient of T cells     | $4.32 \times 10^{-6} \text{ cm}^2/\text{day}$           | [22,25] & estimated |
| $s_M$     |                                      | $5 \times 10^6 \text{ pg}/\text{cm}^3$                  | [58,77] & estimated |
| $\beta_1$ | Chemotaxis rate of T cell from MCP-1 | $8.64 \times 10^{-9} \text{ cm}^5/\text{pg}/\text{day}$ | [78–80] & estimated |
| $\beta_2$ | Activation rate from IL-12           | $2.5 \times 10^5 \text{ cell}/\text{cm}^3/\text{day}$   | [58,77] & estimated |
| $a_1$     | Production rate of IL-10 by MDSC     | $2 \text{ pg}/\text{cell}$                              | estimated           |
| $a_2$     | Chemotaxis rate of MCP-1 by MDSC     | $10^{-2} \text{ pg}/\text{cell}$                        | estimated           |
| $a_3$     | Production rate of IL-12 by MDSC     | $10^{-2} \text{ pg}/\text{cell}$                        | estimated           |
| $c_5$     |                                      | $7.5 \times 10 \text{ pg}/\text{cm}^3$                  | [56,77] & estimated |
| $s_\beta$ |                                      | $2.9 \times 10^3 \text{ pg}/\text{cm}^3$                | [34] & estimated    |
| $\mu_T$   | Death rate of T cells                | $3 \times 10^{-1}/\text{day}$                           | [58,81–85]          |

doi:10.1371/journal.pone.0110126.t007

$$\begin{aligned} \frac{\partial w}{\partial r} + \mu(w - w_0) &= 0 \text{ at } r = L, \\ \frac{\partial e}{\partial r} + \mu(e - e_0) &= 0 \text{ at } r = L \end{aligned} \quad (12) \quad = \frac{\tau}{L_0^2} \{D_c, D_q, D_M, D_{I_{35}}, D_R, D_\beta, D_T, D_h, D_e, D_w\},$$

where  $\mu$  is the flux rate of EC from healthy normal tissue into the tumor microenvironment.

**Parameters nondimensionalization..** We nondimensionalize the Equations (1)–(10) by the following scaling:

$$\{\hat{\mu}_c, \hat{\mu}_q, \hat{\mu}_M, \hat{\mu}_{35}, \hat{\mu}_R, \hat{\mu}_\beta, \hat{\mu}_T, \hat{\mu}_h\} = \tau \{\mu_c, \mu_q, \mu_M, \mu_{35}, \mu_R, \mu_\beta, \mu_T, \mu_h\},$$

$$\hat{r} = r/L_0, \hat{t} = t/\tau, \quad \{\hat{\alpha}_q, \hat{\alpha}_M, \hat{\alpha}_{35}\} = \tau \{c_0 \alpha_q / q_0, \alpha_M, c_0 \alpha_{35} / I_{35}^0\},$$

$$\hat{c} = c/c_0, \hat{q} = q/q_0, \hat{M} = M/M^0, \hat{I}_{35} = I_{35}/I_{35}^0, \hat{R} = R/R_0,$$

$$\{\hat{\beta}_{35}, \hat{\gamma}_{35}\} = \tau \{R_0 \beta_{35} / I_{35}^0, M^0 \gamma_{35} / I_{35}^0\}, \{\hat{k}_q, \hat{k}_h\} = \frac{\tau}{L_0^2} \{q_0 k_q, h_0 k_h\},$$

$$\hat{T} = T/T_0, \hat{h} = h/h_0, \hat{e} = e/e_0, \hat{w} = w/w_0,$$

$$\{\hat{\delta}_M, \hat{\delta}_\beta\} = \tau \{\delta_M / R_0, \delta_\beta / R_0\}, \{\hat{v}_c, \hat{v}_R\} = \tau \{c_0 v_c / I_\beta^0, R_0 v_R / I_\beta^0\},$$

$$\{\hat{D}_c, \hat{D}_q, \hat{D}_M, \hat{D}_{I_{35}}, \hat{D}_R, \hat{D}_\beta, \hat{D}_T, \hat{D}_h, \hat{D}_e, \hat{D}_w\}$$

**Table 8.** Parameters for the VEGF equation.

| Parameter   | Description                   | Dimensional                                             | Reference           |
|-------------|-------------------------------|---------------------------------------------------------|---------------------|
| $D_h$       | Diffusion coefficient of VEGF | $8.64 \times 10^{-2} \text{ cm}^2/\text{day}$           | [22,55,86,87]       |
| $k_1$       |                               | $3.7 \times 10^2 \text{ pg}/\text{cm}^3$                | estimated           |
| $\sigma_h$  | Critical value of $I_{35}$    | $3.7 \times 10^5 \text{ pg}/\text{cm}^3$                | estimated           |
| $q_0$       | Critical value of M-CSF       | $10^3 \text{ pg}/\text{cm}^3$                           | [22,55]             |
| $k_2$       |                               | $q_0/100 = 10 \text{ pg}/\text{cm}^3$                   | estimated           |
| $\mu_h$     | Decay rate of VEGF            | $1.08864 \times 10/\text{day}$                          | [22,57]             |
| $\lambda_5$ |                               | $2.86 \times 10^{-4} \text{ pg}/\text{cell}/\text{day}$ | [22,55] & estimated |
| $\lambda_6$ |                               | $1.58 \times 10^{-3} \text{ pg}/\text{cell}/\text{day}$ | [22,55]             |
| $w^*$       |                               | $4.185 \times 10^8 \text{ pg}/\text{cm}^3$              | [22,55] & estimated |

doi:10.1371/journal.pone.0110126.t008

**Table 9.** Parameters for the EC equation.

| Parameter      | Description                            | Dimensional                                               | Reference              |
|----------------|----------------------------------------|-----------------------------------------------------------|------------------------|
| $D_e$          | Diffusion coefficient of EC            | $4.32 \times 10^{-6} \text{ cm}^2/\text{day}$             | [22,25,57] & estimated |
| $k_h$          | Chemotaxis force of EC by VEGF         | $4.1472 \times 10^{-7} \text{ cm}^5/\text{pg}/\text{day}$ | [22,87] & estimated    |
| $\lambda_{12}$ | Proliferation rate by VEGF             | $5.83 \times 10^{-1}/\text{day}$                          | [88] & estimated       |
| $e_1$          | Maximal density of EC inside the tumor | $7.5 \times 10^6 \text{ cell}/\text{cm}^3$                | [22] & estimated       |
| $h_0$          | Scaling parameter for VEGF             | $10^3 \text{ pg}/\text{cm}^3$                             | [89] & estimated       |
| $h_1$          | Threshold concentration of VEGF        | $1.48 \times 10^3 \text{ pg}/\text{cm}^3$                 | [90] & estimated       |

doi:10.1371/journal.pone.0110126.t009

$$\{\hat{\lambda}_1(\hat{w}), \hat{\lambda}_2(\hat{w}), \hat{\lambda}_5(\hat{w}), \hat{\lambda}_6(\hat{w})\} = \{c_0 = 7.2 \times 10^8 \text{ cell}/\text{cm}^3, T_0 = R_0 = 10^5 \text{ cell}/\text{cm}^3, \\ \tau\{\lambda_1(w), \lambda_2(w), c_0\lambda_5(w)/h_0, M^0\lambda_6(w)/h_0\}, \\ M^0 = 2 \times 10^8 \text{ cell}/\text{cm}^3,$$

$$e_0 = 2.5 \times 10^6 \text{ cell}/\text{cm}^3, w_0 = 4.65 \times 10^8 \text{ pg}/\text{cm}^3,$$

$$\{\hat{\lambda}_7, \hat{\lambda}_8, \hat{\lambda}_9, \hat{\lambda}_{10}, \hat{\lambda}_{11}, \hat{\lambda}_{12}\} = \tau\{e_0\lambda_7/w_0, T_0\lambda_8, M^0\lambda_9, R_0\lambda_{10}, c_0\lambda_{11}, \lambda_{12}\},$$

$$q_0 = h_0 = 10^3 \text{ pg}/\text{cm}^3, I_{35}^0 = 10^2 \text{ pg}/\text{cm}^3, I_\beta^0 = 2.4 \times 10^3 \text{ pg}/\text{cm}^3.$$

$$\hat{\sigma}_0 = \tau\sigma_0/M^0, \hat{\sigma}_1 = \tau\sigma_1, \hat{\sigma}_h = \sigma_h/I_{35}^0, \hat{\sigma}_M = \sigma_M/q_0, \hat{\sigma}_R = \\ \sigma_R/M^0, \hat{\sigma}_\beta = \sigma_\beta/I_\beta^0,$$

$$\hat{\beta}_1 = M^0\tau\beta_1/L_0^2, \hat{\beta}_2 = \tau\beta_2/T_0, \hat{\gamma}_{35} = \tau M^0\gamma_{35}/I_{35}^0, \hat{\eta}_c = T_0\tau\eta_c,$$

$$\hat{a}_1 = 1, \hat{a}_2 = 1, \hat{a}_3 = 0.01, \hat{c}^* = c^*/c_0, \hat{c}_5 = c_5/M^0, \hat{c}_M = c_M/I_{35}^0, \\ \hat{M}_0 = 1,$$

$$\hat{k}_1 = k_1/I_{35}^0, \hat{k}_2 = k_2/q_0, \hat{e}_1 = e_1/e_0, \hat{h}_1 = h_1/h_0, \hat{s}_M = s_M/M^0, \\ \hat{s}_\beta = s_\beta/I_\beta^0,$$

where the scaling parameters are

$$L_0 = 0.5 \text{ cm}, \tau = 3 \text{ days},$$

The dimensional and nondimensional values of all the parameters of Tables 1–10 are summarized in Tables 11 and 12.

After dropping the symbol “ $\hat{\cdot}$ ”, the model equations in the nondimensional form are as follows:

### Numerical simulation

In accordance with the experiments in Wang et al. [1], we consider two types of mice plasmacytoma J558 cells in wild type mice:

- (i) J558-Ctrl tumor cells that secrete a very small amount of  $I_{35}$ .
- (ii) J558-IL-35 tumor cells that secrete a large amount of  $I_{35}$ .

We use matlab with  $dr = 1/40$  and  $dt = 7/216000$  in nondimensional variables (i.e.,  $dr = 1/80 \text{ cm}$  and  $dt = 7/72000 \text{ day}$  in dimensional variables). Figure 2 displays the spatial distributions of tumor cell density in cases (i)–(ii) at different times. We note that, in Figure 2, as time goes on, tumor cells migrate toward the boundary  $r = 1.5 \text{ cm}$ , where oxygen is rich while tumor cell density is lower near the center  $r = 0 \text{ cm}$ , where oxygen is sparse. The migration speeds of these two cases (i)–(ii) are similar to each other, but tumor cells with larger  $I_{35}$  production (i.e., J558-IL-35 case) have higher peak during migration.

**Table 10.** Parameters for the oxygen equation.

| Parameter      | Description                     | Dimensional                                                  | Reference              |
|----------------|---------------------------------|--------------------------------------------------------------|------------------------|
| $\lambda_7$    | Delivery rate of oxygen         | $6.3936 \times 10^2 \text{ pg}/\text{cell}/\text{day}$       | [55]                   |
| $D_w$          | Diffusion coefficient of oxygen | $4.32 \times 10^{-2} \text{ cm}^2/\text{day}$                | [25,55,69,87]          |
| $\lambda_8$    | Consumption rate by T cells     | $1.61568 \times 10^{-8} \text{ cm}^3/\text{cell}/\text{day}$ | [55,65] & estimated    |
| $\lambda_9$    | Consumption rate by MDSC        | $1.61568 \times 10^{-8} \text{ cm}^3/\text{cell}/\text{day}$ | [55,56,65] & estimated |
| $\lambda_{10}$ | Consumption rate by $T_{reg}$   | $1.61568 \times 10^{-8} \text{ cm}^3/\text{cell}/\text{day}$ | [55,65] & estimated    |
| $\lambda_{11}$ | Consumption rate by tumor cells | $1.728 \times 10^{-8} \text{ cm}^3/\text{cell}/\text{day}$   | [55,91,92]             |

doi:10.1371/journal.pone.0110126.t010



The results of Wang et al. [1] were reported 2 weeks after injection of tumor cells into mice. Hence, we compare our simulations at the end of the second week with the results in [1]. In Figure 3(C), the ratio for MDSC of J558-IL-35 to J558-Ctrl is 2,

combining these results (Figures seven B, seven D, and seven E in [1]), we find that this ratio (for T<sub>reg</sub>/CD8<sup>+</sup> T cells) is 0.54. From our Figures 3(E) and 3(H), we compute the ratio of J558-IL-35 to J558-Ctrl to be 0.56. Thus in all the above three cases we get a

$$\left\{ \begin{aligned}
 \frac{\partial c}{\partial t} &= \underbrace{D_c \frac{1}{r^2} \frac{\partial}{\partial r} (r^2 \frac{\partial c}{\partial r})}_{\text{diffusion}} + \underbrace{\lambda_1(w)c(1 - \frac{c}{c^*})}_{\text{proliferation}} - \underbrace{\lambda_2(w)c}_{\text{death by necrosis}} - \underbrace{\mu_c c}_{\text{apoptosis}} - \underbrace{\eta_c Tc}_{\text{killed by T cell}} \\
 \frac{\partial q}{\partial t} &= \underbrace{D_q \frac{1}{r^2} \frac{\partial}{\partial r} (r^2 \frac{\partial q}{\partial r})}_{\text{diffusion}} + \underbrace{\alpha_q c}_{\text{production by tumor}} - \underbrace{\mu_q q}_{\text{decay}} \\
 \frac{\partial M}{\partial t} &= \underbrace{\sigma_0}_{\text{source}} + \underbrace{\sigma_1 M_0 \times \frac{I_{35}}{I_{35} + c_M}}_{\text{induction of myeloid cells by } I_{35}} + \underbrace{D_M \frac{1}{r^2} \frac{\partial}{\partial r} (r^2 \frac{\partial M}{\partial r})}_{\text{diffusion}} - \underbrace{\frac{1}{r^2} \frac{\partial}{\partial r} (r^2 k_q M \frac{\partial q}{\partial r})}_{\text{chemotaxis by M-CSF}} \\
 &+ \underbrace{\frac{\alpha_M q M_0}{\sigma_M + q}}_{\text{differentiation from myeloid cells}} - \underbrace{\mu_M M}_{\text{death}} \\
 \frac{\partial I_{35}}{\partial t} &= \underbrace{D_{I_{35}} \frac{1}{r^2} \frac{\partial}{\partial r} (r^2 \frac{\partial I_{35}}{\partial r})}_{\text{diffusion}} + \underbrace{\alpha_{35} c}_{\text{production by tumor}} + \underbrace{\beta_{35} R}_{\text{production by Treg}} + \underbrace{\gamma_{35} M}_{\text{production by MDSC}} - \underbrace{\mu_{35} I_{35}}_{\text{decay}} \\
 \frac{\partial R}{\partial t} &= \underbrace{D_R \frac{1}{r^2} \frac{\partial}{\partial r} (r^2 \frac{\partial R}{\partial r})}_{\text{diffusion}} + \underbrace{\delta_M \frac{M}{M + \sigma_R}}_{\text{(indirect) activation by MDSC}} + \underbrace{\delta_\beta \frac{I_\beta}{I_\beta + \sigma_\beta}}_{\text{activation by TGF-}\beta} - \underbrace{\mu_R R}_{\text{death}} \\
 \frac{\partial I_\beta}{\partial t} &= \underbrace{D_\beta \frac{1}{r^2} \frac{\partial}{\partial r} (r^2 \frac{\partial I_\beta}{\partial r})}_{\text{diffusion}} + \underbrace{\nu_c c}_{\text{production by tumor}} + \underbrace{\nu_R R}_{\text{production by Treg}} - \underbrace{\mu_\beta I_\beta}_{\text{decay}} \\
 \frac{\partial T}{\partial t} &= \underbrace{D_T \frac{1}{r^2} \frac{\partial}{\partial r} (r^2 \frac{\partial T}{\partial r})}_{\text{diffusion}} + \underbrace{\frac{s_M}{s_M + a_1 M}}_{\text{inhibition}} \times \left[ - \underbrace{\frac{1}{r^2} \frac{\partial}{\partial r} (r^2 \beta_1 T \frac{\partial (a_2 M)}{\partial r})}_{\text{(indirect) chemotaxis by MCP-1}} + \underbrace{\frac{\beta_2 (a_3 M)}{(a_3 M) + c_5}}_{\text{(indirect) activation}} \times \underbrace{\frac{s_\beta}{s_\beta + I_\beta}}_{\text{inhibit by } I_\beta} \right] \\
 &- \underbrace{\mu_T T}_{\text{death}} \\
 \frac{\partial h}{\partial t} &= \underbrace{D_h \frac{1}{r^2} \frac{\partial}{\partial r} (r^2 \frac{\partial h}{\partial r})}_{\text{diffusion}} + \underbrace{\lambda_5(w)c \times \frac{I_{35} + k_1}{I_{35} + \sigma_h}}_{\text{production by tumor promoted by } I_{35}} + \underbrace{\lambda_6(w)M \times \frac{q + k_2}{q + 1}}_{\text{production by MDSC}} - \underbrace{\mu_h h}_{\text{decay}} \\
 \frac{\partial e}{\partial t} &= \underbrace{D_e \frac{1}{r^2} \frac{\partial}{\partial r} (r^2 \frac{\partial e}{\partial r})}_{\text{diffusion}} - \underbrace{\frac{1}{r^2} \frac{\partial}{\partial r} (r^2 k_h e \frac{\partial h}{\partial r})}_{\text{chemotaxis by VEGF}} + \underbrace{\lambda_{12} e (1 - \frac{e}{e_1})(h - h_1) H(h - h_1)}_{\text{proliferation}} \\
 \frac{\partial w}{\partial t} &= \underbrace{\lambda_7 e}_{\text{delivered by EC}} + \underbrace{D_w \frac{1}{r^2} \frac{\partial}{\partial r} (r^2 \frac{\partial w}{\partial r})}_{\text{diffusion}} - \underbrace{\lambda_8 T w}_{\text{uptake by CD8}^+ \text{ T cell}} - \underbrace{\lambda_9 M w}_{\text{uptake by MDSC}} - \underbrace{\lambda_{10} R w}_{\text{uptake by Treg}} \\
 &- \underbrace{\lambda_{11} c w}_{\text{uptake by tumor}} .
 \end{aligned} \right. \tag{13}$$

which is the same as Figure five A in [1]. In Figure 3(H), the ratio for VEGF of J558-IL-35 to J558-Ctrl is 17, which is the approximately same as Figure four D in [1]. Next, we compare the ratio for T<sub>reg</sub>/CD8<sup>+</sup> T cells of J558-IL-35 to J558-Ctrl with the result in [1]. But, in [1], they only showed the percentages of CD8<sup>+</sup>/CD45<sup>+</sup>, of CD4<sup>+</sup>/CD45<sup>+</sup>, and of Foxp3<sup>+</sup>/CD4<sup>+</sup>. By

very good quantitative fit with the experimental results of Wang et al. [1]. Finally, from Figure 3(A), we see that for tumor cells the ratio of J558-IL-35 to J558-Ctrl is 2.4, which is somewhat less than the ratio for the tumor volume of B16-IL-35 mice to B16-Ctrl mice in Figure three F in [1], and significantly less for J558-IL-35 mice. This discrepancy may be explained by the fact that *in vivo* the

**Table 11.** Model parameters and units.

| Parameter      | Dimensional                                           | Dimensionless                           |
|----------------|-------------------------------------------------------|-----------------------------------------|
| $D_c$          | $4.32 \times 10^{-6} \text{ cm}^2/\text{day}$         | $5.184 \times 10^{-5}$                  |
| $D_q$          | $1.728 \times 10^{-1} \text{ cm}^2/\text{day}$        | 2.0736                                  |
| $D_M$          | $4.32 \times 10^{-6} \text{ cm}^2/\text{day}$         | $5.184 \times 10^{-5}$                  |
| $D_{I_{35}}$   | $1.25 \times 10^{-3} \text{ cm}^2/\text{day}$         | $1.5 \times 10^{-2}$                    |
| $D_R$          | $4.32 \times 10^{-6} \text{ cm}^2/\text{day}$         | $5.184 \times 10^{-5}$                  |
| $D_\beta$      | $8.64 \times 10^{-2} \text{ cm}^2/\text{day}$         | 1.0368                                  |
| $D_T$          | $4.32 \times 10^{-6} \text{ cm}^2/\text{day}$         | $5.184 \times 10^{-5}$                  |
| $D_h$          | $8.64 \times 10^{-2} \text{ cm}^2/\text{day}$         | 1.0368                                  |
| $D_e$          | $4.32 \times 10^{-6} \text{ cm}^2/\text{day}$         | $5.184 \times 10^{-5}$                  |
| $D_w$          | $4.32 \times 10^{-2} \text{ cm}^2/\text{day}$         | $5.184 \times 10^{-1}$                  |
| $\alpha_q$     | $2.7648 \times 10^{-5} \text{ pg/cell/day}$           | $5.97197 \times 10$                     |
| $\alpha_M$     | $7.5 \times 10^{-1}/\text{day}$                       | 2.25                                    |
| $\alpha_{35}$  | $10^{-3} \text{ pg/cell/day}$ for J558-IL-35 mouse    | $2.16 \times 10^4$ for J558-IL-35 mouse |
| $\alpha_{35}$  | $10^{-7} \text{ pg/cell/day}$ for J558-Ctrl mouse     | 2.16 for J558-Ctrl mouse                |
| $\beta_{35}$   | $1.67 \times 10^{-3} \text{ pg/cell/day}$             | 5                                       |
| $\gamma_{35}$  | $10^{-4} \text{ pg/cell/day}$                         | $6 \times 10^2$                         |
| $\delta_M$     | $1.25 \times 10^6 \text{ cell/cm}^3/\text{day}$       | $3.75 \times 10$                        |
| $\delta_\beta$ | $3.327 \times 10^6 \text{ cell/cm}^3/\text{day}$      | 99.81                                   |
| $\eta_c$       | $3.1574 \times 10^{-6} \text{ cm}^3/\text{cell/day}$  | $9.47232 \times 10^{-1}$                |
| $\sigma_0$     | $5.51725 \times 10^4 \text{ cell/cm}^3/\text{day}$    | $8.2759 \times 10^{-4}$                 |
| $\sigma_1$     | $4.65518 \times 10^2/\text{day}$                      | $1.39655 \times 10^3$                   |
| $\sigma_M$     | $7.5 \times 10 \text{ pg/cm}^3$                       | $7.5 \times 10^{-2}$                    |
| $\sigma_R$     | $10^7 \text{ cell/cm}^3$                              | $5 \times 10^{-2}$                      |
| $\sigma_\beta$ | $2.4 \times 10^3 \text{ pg/cm}^3$                     | 1                                       |
| $\sigma_h$     | $3.7 \times 10^5 \text{ pg/cm}^3$                     | $3.7 \times 10^3$                       |
| $\lambda_1$    | $2.5/\text{day}$                                      | 7.5                                     |
| $\lambda_2$    | $8.3 \times 10^{-1}/\text{day}$                       | 2.49                                    |
| $\lambda_5$    | $2.86 \times 10^{-4} \text{ pg/cell/day}$             | $6.1776 \times 10^2$                    |
| $\lambda_6$    | $1.58 \times 10^{-3} \text{ pg/cell/day}$             | $9.48 \times 10^2$                      |
| $\lambda_7$    | $6.3936 \times 10^2 \text{ pg/cell/day}$              | $1.03123 \times 10$                     |
| $\lambda_8$    | $1.61568 \times 10^{-8} \text{ cm}^3/\text{cell/day}$ | $4.84704 \times 10^{-3}$                |
| $\lambda_9$    | $1.61568 \times 10^{-8} \text{ cm}^3/\text{cell/day}$ | 9.69408                                 |
| $\lambda_{10}$ | $1.61568 \times 10^{-8} \text{ cm}^3/\text{cell/day}$ | $4.84704 \times 10^{-3}$                |
| $\lambda_{11}$ | $1.728 \times 10^{-8} \text{ cm}^3/\text{cell/day}$   | $3.73248 \times 10$                     |
| $\lambda_{12}$ | $5.83 \times 10^{-1}/\text{day}$                      | 1.75                                    |
| $\nu_c$        | $5.5 \times 10^{-6} \text{ pg/cell/day}$              | 4.95                                    |
| $\nu_R$        | $9 \times 10^{-7} \text{ pg/cell/day}$                | $1.125 \times 10^{-4}$                  |
| $\epsilon$     | 1                                                     | 1                                       |
| $\mu_c$        | $4.15 \times 10^{-1}/\text{day}$                      | 1.245                                   |
| $\mu_q$        | $4.1472/\text{day}$                                   | $1.24416 \times 10$                     |
| $\mu_M$        | $3 \times 10^{-2}/\text{day}$                         | $9 \times 10^{-2}$                      |
| $\mu_{35}$     | $2/\text{day}$                                        | 6                                       |
| $\mu_R$        | $10^{-1}/\text{day}$                                  | $3 \times 10^{-1}$                      |
| $\mu_\beta$    | $0.693/\text{day}$                                    | 2.079                                   |
| $\mu_T$        | $3 \times 10^{-1}/\text{day}$                         | $9 \times 10^{-1}$                      |
| $\mu_h$        | $1.08864 \times 10/\text{day}$                        | $3.26592 \times 10$                     |
| $\mu$          | $10/\text{cm}$                                        | 5                                       |

doi:10.1371/journal.pone.0110126.t011

**Table 12.** Model parameters and units.

| Parameter   | Dimensional                                        | Dimensionless            |
|-------------|----------------------------------------------------|--------------------------|
| $c^*$       | $10^9 \text{ cell/cm}^3$                           | 1.38889(1.39)            |
| $c_M$       | $10^5 \text{ pg/cm}^3$                             | $10^3$                   |
| $k_1$       | $3.7 \times 10^2 \text{ pg/cm}^3$                  | 3.7                      |
| $k_2$       | $10 \text{ pg/cm}^3$                               | $10^{-2}$                |
| $k_h$       | $4.1472 \times 10^{-7} \text{ cm}^5/\text{pg/day}$ | $4.97664 \times 10^{-3}$ |
| $k_q$       | $5.2 \times 10^{-7} \text{ cm}^5/\text{pg/day}$    | $6.24 \times 10^{-3}$    |
| $M_0$       | $8 \times 10^3 \text{ cell/cm}^3$                  | $4 \times 10^{-5}$       |
| $s_M$       | $5 \times 10^6 \text{ cell/cm}^3$                  | $2.5 \times 10^{-2}$     |
| $s_\beta$   | $2.9 \times 10^3 \text{ pg/cm}^3$                  | 1.20833                  |
| $w_n$       | $3.57 \times 10^{-7} \text{ pg/cm}^3$              | $7.68 \times 10^{-2}$    |
| $w_h$       | $10^8 \text{ pg/cm}^3$                             | $2.15 \times 10^{-1}$    |
| $w_*$       | $4.185 \times 10^8 \text{ pg/cm}^3$                | $9 \times 10^{-1}$       |
| $\beta_1$   | $8.64 \times 10^{-9} \text{ cm}^5/\text{pg/day}$   | $2.0736 \times 10$       |
| $\beta_2$   | $2.5 \times 10^5 \text{ cell/cm}^3/\text{day}$     | 7.5                      |
| $a_1$       | $2 \text{ pg/cell}$                                | 2                        |
| $a_2$       | $10^{-2} \text{ pg/cell}$                          | $10^{-2}$                |
| $a_3$       | $10^{-2} \text{ pg/cell}$                          | $10^{-2}$                |
| $c_5$       | $7.5 \times 10 \text{ pg/cm}^3$                    | $3.75 \times 10^{-7}$    |
| $e_1$       | $7.5 \times 10^6 \text{ cell/cm}^3$                | 3                        |
| $h_1$       | $1.48 \times 10^3 \text{ pg/cm}^3$                 | 1.48                     |
| $a$         | $2.25 \text{ cm}^2$                                | 9                        |
| $L_0$       | $5 \times 10^{-1} \text{ cm}$                      | 1                        |
| $L$         | $1.5 \text{ cm}$                                   | 3                        |
| $\tau$      | 3 days                                             | 1                        |
| $c_0$       | $7.2 \times 10^8 \text{ cell/cm}^3$                | 1                        |
| $q_0$       | $10^3 \text{ pg/cm}^3$                             | 1                        |
| $M^0$       | $2 \times 10^8 \text{ cell/cm}^3$                  | 1                        |
| $I_{35}^0$  | $10^2 \text{ pg/cm}^3$                             | 1                        |
| $R_0$       | $10^5 \text{ cell/cm}^3$                           | 1                        |
| $I_\beta^0$ | $2.4 \times 10^3 \text{ pg/cm}^3$                  | 1                        |
| $T_0$       | $10^5 \text{ cell/c.}^3$                           | 1                        |
| $h_0$       | $10^3 \text{ pg/cm}^3$                             | 1                        |
| $e_0$       | $2.5 \times 10^6 \text{ cell/cm}^3$                | 1                        |
| $w_0$       | $4.65 \times 10^8 \text{ pg/cm}^3$                 | 1                        |

doi:10.1371/journal.pone.0110126.t012

arrival of MDSCs to the tumor microenvironment is somewhat delayed and therefore the number of CD8<sup>+</sup> T cells in the control case is significantly less than in the J558-IL-35 case, while (for simplicity) our model does not include such a time delay.

The subunits of IL-35, EB13 and IL-12p35, are highly expressed in cancers such as lung cancer, colorectal cancer, and esophageal carcinoma [2,3]. Anti-IL-35 drug blocks the expression of IL-35 and could be an agent in treating these cancers [48]. To determine the effect of anti-IL-35 drug on cancer growth, we proceed to introduce it, as a drug, into our model. If we denote its concentration by  $f(r,t)$  then all we need to do is to modify Equation (4) by

$$\frac{\partial I_{35}}{\partial t} = \underbrace{D_{I_{35}} \frac{1}{r^2} \frac{\partial}{\partial r} \left( r^2 \frac{\partial I_{35}}{\partial r} \right)}_{\text{diffusion}} + \frac{1}{f(r,t)} \left[ \underbrace{\alpha_{35} C}_{\text{production by tumor}} + \underbrace{\beta_{35} R}_{\text{production by Treg}} + \underbrace{\gamma_{35} M}_{\text{production by MDSC}} \right] - \underbrace{\mu_{35} I_{35}}_{\text{decay}} \quad (14)$$

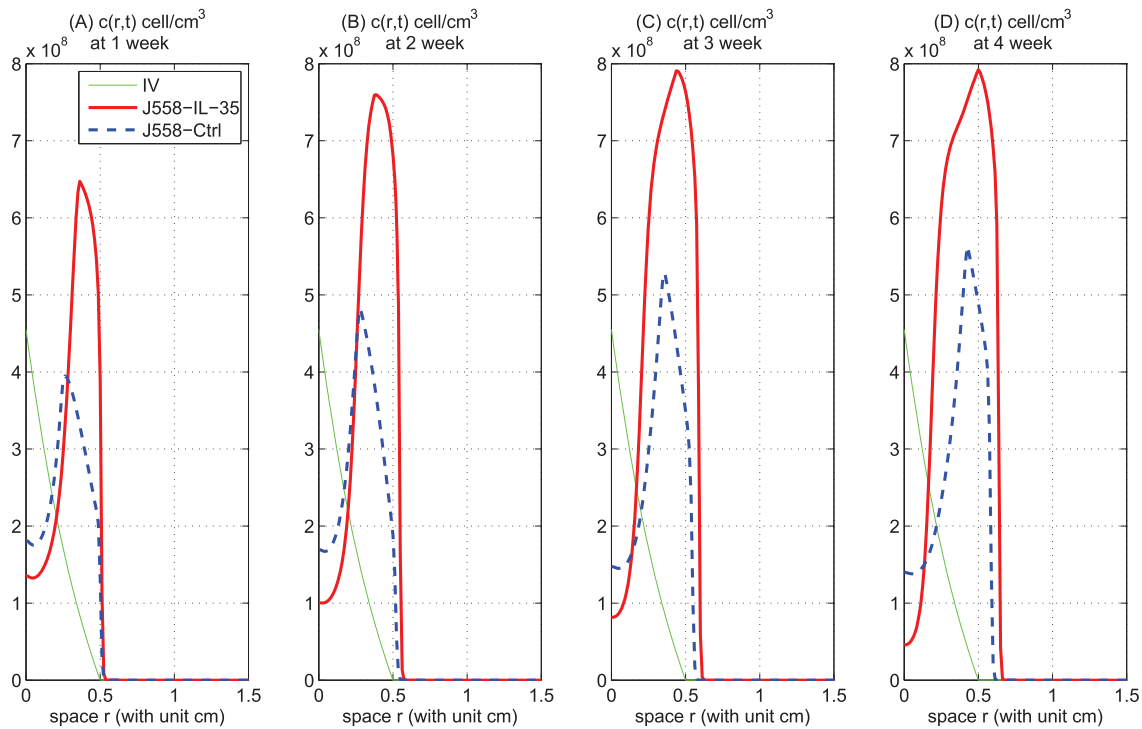

**Figure 2. Spatial distributions of tumor cells.** (A), (B), (C), and (D) are the spatial distributions of tumor cells  $c(r,t)$  in the mice model at the end of the 2nd, 4th, 6th, and 8th weeks, respectively, for cases (i) and (ii). The thin curve is the initial value of tumor cells for the cases (i) and (ii). The solid curve is for J558-IL-35 tumor cells with large  $I_{35}$  production (case (ii)) and the dashed curve is for J558-Ctrl tumor cells (case (i)).  
doi:10.1371/journal.pone.0110126.g002

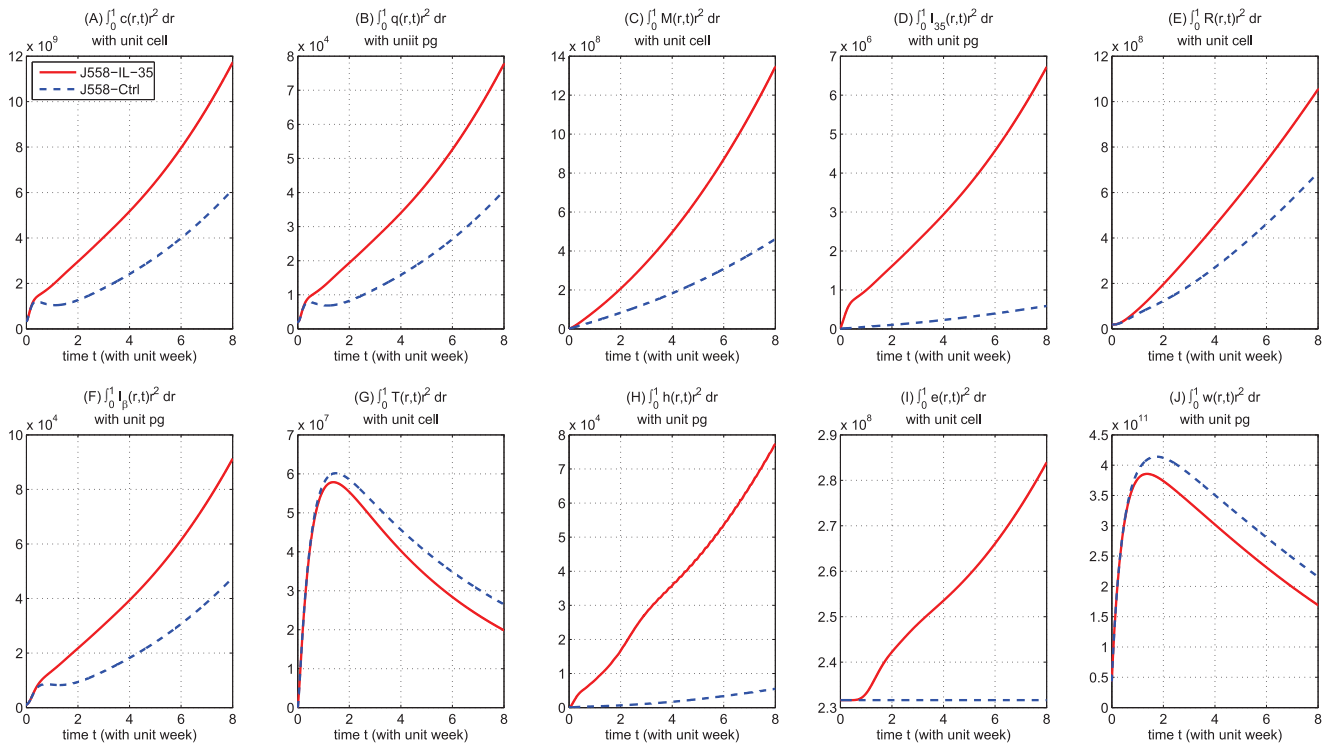

**Figure 3. Evolution of cells and cytokines for J558-IL-35 and J558-Ctrl mice models.** Panels (A) to (J) show the profiles of the total numbers of tumor cells, M-CSF, MDSCs,  $I_{35}$ ,  $T_{regS}$ ,  $TGF-\beta$ ,  $CD8^+$  T cells, VEGF, endothelial cells, and oxygen, for cases (i) and (ii). The solid curve is for J558-IL-35 tumor cells with large  $I_{35}$  production (case (ii)) and the dashed curve is for J558-Ctrl tumor cells (case (i)).  
doi:10.1371/journal.pone.0110126.g003

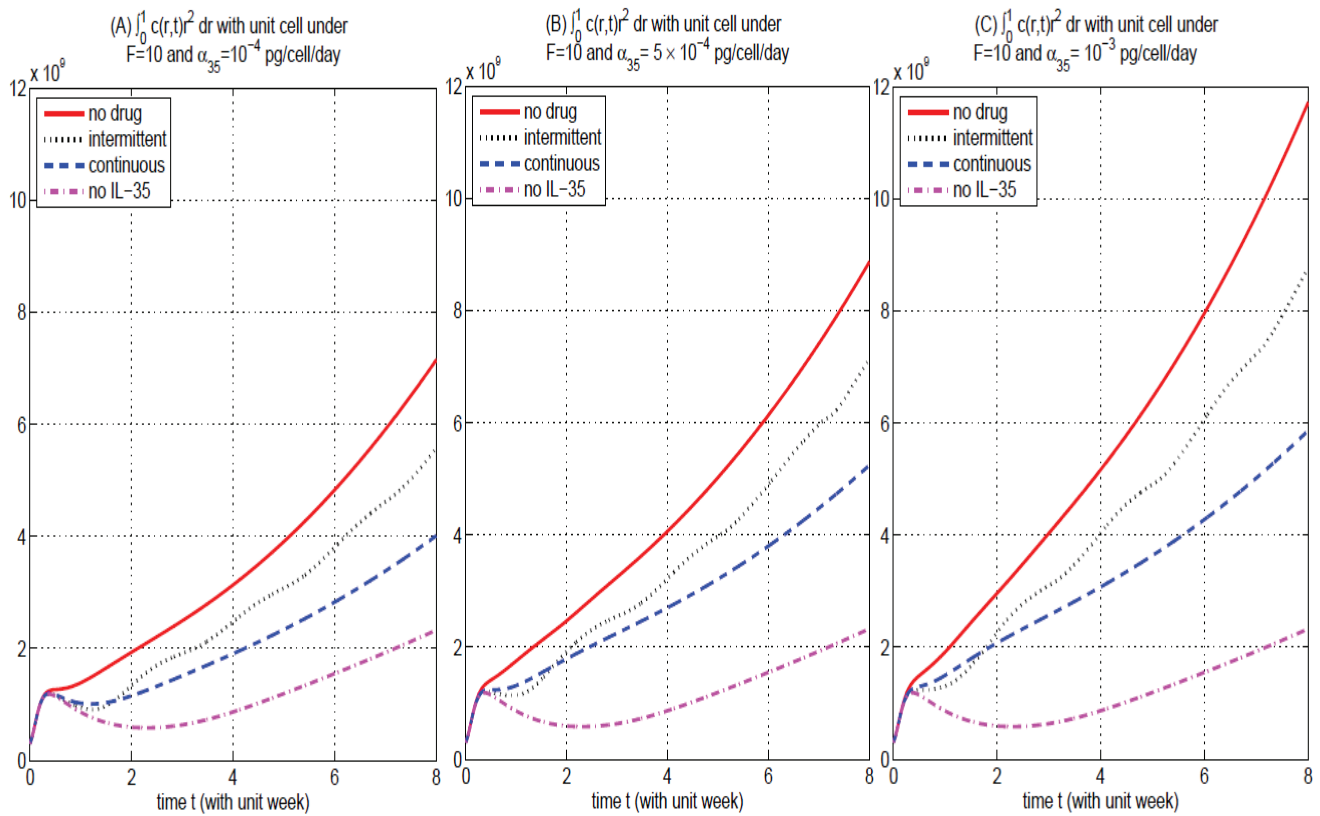

**Figure 4. Comparison of continuous versus intermittent treatment in different production rate  $\alpha_{35}$  with drug strength  $F = 10$ .** (A), (B), and (C) are the profiles of total numbers of  $c(r,t)$ , under  $\alpha_{35} = 10^{-4}$  pg/cell/day,  $\alpha_{35} = 5 \times 10^{-4}$  pg/cell/day, and  $\alpha_{35} = 10^{-3}$  pg/cell/day, respectively. The solid curve is for case (i) that no dosing of anti-IL-35 in tumor cells. The dashed and dotted curves are for tumor cells with continuous (case (ii)) and intermittent (case (iii)) drug injections, respectively. The dashed-dot curve (— · —) is the case that there is no IL-35 in the tumor microenvironment, i.e.,  $\alpha_{35} = \beta_{35} = \gamma_{35} = 0$  and  $I_{35}(r,0) \equiv 0$ , for  $0 \leq r \leq L$ . doi:10.1371/journal.pone.01110126.g004

We make the pharmacokinetic assumption that  $f(r,t)$  decreases in  $r$  from the outer boundary of the tumor ( $r = 1.5$  cm) towards the center of the tumor ( $r = 0$ ), and take

$$f(r,t) = F \times \frac{r^2 + a}{L^2 + a}, \tag{15}$$

where  $a = L^2 (= 2.25 \text{ cm}^2)$  and  $F = 10$ . We shall compare several dosing schedules:

- (i) no dosing of anti-IL-35, i.e.,  $f(r,t) = 1$ , for all  $t$  and  $0 \leq r \leq L$ ;
- (ii) continuous dosing with anti-IL-35 at fixed level  $F$  for 2 months,

$$f(r,t) = F \times \frac{r^2 + a}{L^2 + a}, \text{ for } 0 \leq r \leq L \text{ and } 0 \leq t \leq 2 \text{ months}; \tag{16}$$

- (iii) intermittent dosing for 2 months, at double level  $2F$ , one week at a time with one week spacing between dosing,

$$f(r,t) = \begin{cases} 2F \times \frac{r^2 + a}{L^2 + a}, & \text{for } 0 \leq r \leq L \text{ and } t_{2i} \leq t < t_{2i+1}, \\ 0, & \text{for } 0 \leq r \leq L \text{ and } t_{2i+1} \leq t < t_{2(i+1)}, \end{cases} \tag{17}$$

for  $i = 0, 1, 2, 3$ , where  $t_0 = 0$  and the length of each interval  $[t_j, t_{j+1}]$  is one week.

We use matlab with  $dr = 1/80$  cm and  $dt = 7/24000$  day in dimensional variables. Figure 4 shows that the temporal growth of the total numbers of tumor cells, as functions of time, under

- (A)  $\alpha_{35} = 10^{-4}$  pg/cell/day; (B)  $\alpha_{35} = 5 \times 10^{-4}$  pg/cell/day;
- and (C)  $\alpha_{35} = 10^{-3}$  pg/cell/day.

Figure 4 indicates that the continuous treatment has better efficacy in reducing tumor load than intermittent treatment when  $\alpha_{35} \in [10^{-4} \text{ pg/cell/day}, 10^{-3} \text{ pg/cell/day}]$ . Figure 4 also shows that the reduction rate by anti-IL-35 is larger when tumor cells secrete higher amount of IL-35 as in Lung cancer and colorectal cancer [2,3] than lower amount of IL-35 as in plasmacytoma [1]. Accordingly, as  $\alpha_{35}$  increases, the reduction in total tumor population becomes increasingly significant.

### Sensitivity analysis

In this section we perform sensitivity analysis on the parameters (in dimensional form) including those that were only roughly estimated and those that play important role in the model. We list these parameters with their ranges, baselines, and units in Table 13. We use the method described in Marino et al. [49], using the Latin hypercube sampling to generated 500 samples with  $dr = 1/40$  cm and  $dt = 7/12000$  day.

**Table 13.** Parameters chosen for sensitivity analysis.

| Parameter      | Range                                              | Baseline                 | Unit                      |
|----------------|----------------------------------------------------|--------------------------|---------------------------|
| $\alpha_M$     | $[3.75 \times 10^{-1}, 1.5]$                       | $7.5 \times 10^{-1}$     | /day                      |
| $\delta_M$     | $[6.25 \times 10^5, 2.5 \times 10^6]$              | $1.25 \times 10^6$       | cell/cm <sup>3</sup> /day |
| $\delta_\beta$ | $[1.6635 \times 10^6, 6.654 \times 10^6]$          | $3.327 \times 10^6$      | cell/cm <sup>3</sup> /day |
| $\alpha_{35}$  | $[10^{-5}, 10^{-3}]$                               | $5 \times 10^{-4}$       | pg/cell/day               |
| $\beta_{35}$   | $[8.35 \times 10^{-4}, 3.34 \times 10^{-3}]$       | $1.67 \times 10^{-3}$    | pg/cell/day               |
| $\gamma_{35}$  | $[5 \times 10^{-5}, 2 \times 10^{-4}]$             | $10^{-4}$                | pg/cell/day               |
| $v_c$          | $[2.75 \times 10^{-6}, 1.1 \times 10^{-5}]$        | $5.5 \times 10^{-6}$     | pg/cell/day               |
| $v_R$          | $[4.5 \times 10^{-7}, 1.8 \times 10^{-6}]$         | $9 \times 10^{-7}$       | pg/cell/day               |
| $\eta_c$       | $[1.5787 \times 10^{-6}, 6.3148 \times 10^{-6}]$   | $3.1574 \times 10^{-6}$  | cm <sup>3</sup> /cell/day |
| $\sigma_0$     | $[2.75863 \times 10^4, 1.10345 \times 10^5]$       | $5.51725 \times 10^4$    | cell/cm <sup>3</sup> /day |
| $\sigma_1$     | $[2.32759 \times 10^2, 9.31036 \times 10^2]$       | $4.65518 \times 10^2$    | /day                      |
| $\sigma_R$     | $[5 \times 10^6, 2 \times 10^7]$                   | $10^7$                   | cell/cm <sup>3</sup>      |
| $\sigma_\beta$ | $[1.2 \times 10^3, 4.8 \times 10^3]$               | $2.4 \times 10^3$        | pg/cm <sup>3</sup>        |
| $\sigma_h$     | $[1.85 \times 10^5, 7.4 \times 10^5]$              | $3.7 \times 10^5$        | pg/cm <sup>3</sup>        |
| $c_M$          | $[5 \times 10^4, 2 \times 10^5]$                   | $10^5$                   | pg/cm <sup>3</sup>        |
| $s_\beta$      | $[1.45 \times 10^3, 5.8 \times 10^3]$              | $2.9 \times 10^3$        | pg/cm <sup>3</sup>        |
| $s_M$          | $[2.5 \times 10^6, 10^7]$                          | $5 \times 10^6$          | cell/cm <sup>3</sup>      |
| $a_1$          | [1,4]                                              | 2                        | pg/cell                   |
| $a_2$          | $[5 \times 10^{-3}, 2 \times 10^{-2}]$             | $10^{-2}$                | pg/cell                   |
| $a_3$          | $[5 \times 10^{-3}, 2 \times 10^{-2}]$             | $10^{-2}$                | pg/cell                   |
| $k_1$          | $[1.85 \times 10^2, 7.4 \times 10^2]$              | $3.7 \times 10^2$        | pg/cm <sup>3</sup>        |
| $k_2$          | [5,20]                                             | 10                       | pg/cm <sup>3</sup>        |
| $\lambda_1$    | [1.25,5]                                           | 2.5                      | /day                      |
| $\lambda_5$    | $[1.43 \times 10^{-4}, 5.72 \times 10^{-4}]$       | $2.86 \times 10^{-4}$    | pg/cell/day               |
| $\lambda_6$    | $[7.9 \times 10^{-4}, 3.16 \times 10^{-3}]$        | $1.58 \times 10^{-3}$    | pg/cell/day               |
| $\lambda_{10}$ | $[2.42352 \times 10^{-3}, 9.69408 \times 10^{-3}]$ | $4.84704 \times 10^{-3}$ | cm <sup>3</sup> /cell/day |
| $\lambda_{12}$ | $[8.75 \times 10^{-1}, 3.5]$                       | 1.75                     | /day                      |
| $e_1$          | $[3.75 \times 10^6, 1.5 \times 10^7]$              | $7.5 \times 10^6$        | cell/cm <sup>3</sup>      |
| $h_1$          | $[7.4 \times 10^2, 2.96 \times 10^3]$              | $1.48 \times 10^3$       | pg/cm <sup>3</sup>        |

doi:10.1371/journal.pone.0110126.t013

Since we focus on how anti-IL-35 drug inhibits tumor growth, we calculate the partial rank correlation coefficients (PRCC) and p-value, corresponding to the ratio  $C := \int_0^1 c^-(r,t)r^2 dr / \int_0^1 c(r,t)r^2 dr$  for  $t=2$  months, where  $c^-(r,t)$  accounts for continuous treatment and  $c(r,t)$  accounts for of no drug;  $C$  is a measure of the (relative) efficacy of the drug. In this analysis, all the parameters are chosen in the range from half to twofold of their baseline, except  $\alpha_{35}$  which is chosen from  $10^{-5}$  pg/cell/day to  $10^{-3}$  pg/cell/day. Table 14 lists the PRCC and their p-values. Figure 5 plots the PRCC of the parameters with p-values smaller than 0.01. A negative PRCC (i.e. negative correlation) with p-value smaller than 0.01 means that increasing this parameter value will decrease the value of  $C$  and hence increase the (relative) efficacy of the drug. A positive PRCC with p-value smaller than 0.01 has the opposite meaning, that is, it will decrease the efficacy of the drug.

In Table 14, only  $\eta_c$ ,  $e_1$ ,  $\lambda_5$ ,  $s_M$ ,  $s_\beta$ ,  $\alpha_{35}$ , and  $\beta_{35}$  have negative PRCC with p-value smaller than 0.01. The most significant negatively correlated parameter is  $\eta_c$ . Larger  $\lambda_5$  increases the

production of VEGF and larger  $\alpha_{35}$  increases the production of  $I_{35}$  and both increase tumor load. The negative correlation of these parameters shows that the drug is more effective for tumor with higher rate of production of VEGF and IL-35. On the other hand, the negative correlation of  $\eta_c$  shows that the efficacy of the drug improves when the CD8<sup>+</sup> T cells are more affective in killing tumor cells. However, it is not true to conclude that, in general, the drug efficacy increases with larger tumor load, since larger  $\eta_c$  and  $s_\beta$  shrink the tumor load but yield better drug efficacy. Similar results hold for the parameters with positive PRCC. For example, larger  $\lambda_1$  and  $\sigma_0$  lead to higher tumor cell population while the tumor efficacy is decreased.

### Discussion

IL-35 is the most anti-inflammatory cytokine within the IL-12 cytokine family. In this paper we addressed the questions to what extent IL-35 is involved in tumor microenvironment and how effective is anti-IL-35 drug in reducing tumor growth. It is well known that T<sub>reg</sub>s are presented in the tumor microenvironment

**Table 14.** The PRCC and p-value of parameters for sensitivity analysis.

| Parameter      | PRCC        | p-value |
|----------------|-------------|---------|
| $\alpha_M$     | -0.00039409 | >0.01   |
| $\delta_M$     | -0.040652   | >0.01   |
| $\delta_\beta$ | -0.045366   | >0.01   |
| $\alpha_{35}$  | -0.15449    | <0.01   |
| $\beta_{35}$   | -0.12796    | <0.01   |
| $\gamma_{35}$  | 0.055333    | >0.01   |
| $\nu_c$        | 0.17422     | <0.01   |
| $\nu_R$        | 0.021612    | >0.01   |
| $\eta_c$       | -0.7056     | <0.01   |
| $\sigma_0$     | 0.22963     | <0.01   |
| $\sigma_1$     | 0.074071    | >0.01   |
| $\sigma_R$     | -0.03105    | >0.01   |
| $\sigma_\beta$ | 0.022536    | >0.01   |
| $\sigma_h$     | 0.14064     | <0.01   |
| $c_M$          | 0.012563    | >0.01   |
| $s_\beta$      | -0.20223    | <0.01   |
| $s_M$          | -0.25416    | <0.01   |
| $a_1$          | 0.33607     | <0.01   |
| $a_2$          | -0.0067372  | >0.01   |
| $a_3$          | 0.014791    | >0.01   |
| $k_1$          | 0.06582     | >0.01   |
| $k_2$          | -0.070145   | >0.01   |
| $\lambda_1$    | 0.75819     | <0.01   |
| $\lambda_5$    | -0.26421    | <0.01   |
| $\lambda_6$    | -0.00097113 | >0.01   |
| $\lambda_{10}$ | 0.040952    | >0.01   |
| $\lambda_{12}$ | -0.093337   | >0.01   |
| $e_1$          | -0.30227    | <0.01   |
| $h_1$          | 0.28538     | <0.01   |

doi:10.1371/journal.pone.0110126.t014

and that they secrete IL-35 to promote tumor growth. Recent mouse experiments of Wang et al. [1] determined the extent to which IL-35 enhanced the MDSC population and the VEGF concentration, and at the same time decreased the CD8<sup>+</sup> T cell population. Based on these experiments, we developed a mathematical model which includes in addition to tumor cells, MDSCs, CD8<sup>+</sup> T cells, IL-35, and VEGF, also T<sub>reg</sub>s, endothelial cells, oxygen concentration, TGF- $\beta$ , and M-CSF that is produced by cancer cells. The model is described by a system of partial differential equations. The simulations of the model are in qualitative agreement with the experimental results of Wang et al. [1].

We next extended the model to include anti-IL-35 as an anti-cancer drug. We compared the efficacy of the drug under two schedules: continuous versus intermittent injections of the same total amount of the drug. We found that continuous injection has better efficacy while the treatment is ongoing. Since it is well known that some cancers including lung and colorectal cancers most likely secrete large amounts of IL-35, we also investigated the efficacy of the drug for such cancers. We found that the percentage

of tumor reduction under anti-IL-35 drug improves when the production of IL-35 by cancer is increased.

There are currently only few experimental results by which our model can be tested. In recent experiments by Nicholl et al. [50] it was demonstrated that IL-35 promotes pancreatic cancer cells proliferation while anti-IL-35 reduces this promotion. More specifically, in Figure three of Nicholl et al. [50] it is shown that IL-35 (50 ng/ml) increases, on the average, by 100% the proliferation of colonies of several pancreatic cancer cell lines, while in the presence of anti-IL-35 (200 ng/ml) this increase is reduced to 50%. These *in vitro* results are in qualitative agreement with our results in Figure three (at week 8). Another example is taken from colorectal cancer in patients. As reported in Zeng et al. [2], Foxp3<sup>+</sup>T<sub>reg</sub> increases linearly with IL-35, and this is in qualitative agreement with Figures 3D and 3E of our simulations. As more experimental and clinical data become available, we should be able to test our model in more quantitative way, so that the model can further be refined.

In this paper we focused on the role of IL-35, although T<sub>reg</sub> secrete besides IL-35 also other cytokines that promote tumor, such as IL-10 and IL-9 [7,51–54]; these were not included directly in the present model, since we wanted to base the model on the recent experimental data by Wang et al. [1]. When data for other cytokines become available to the same precision as, for instance, in [1], our model could then be extended to include these cytokines, and to obtain a more comprehensive evaluation of anti-IL-35 efficacy in combination with other drugs.

## Methods

### Estimate $D_c$ , $\eta_c$ and $\lambda_1$ in Equation (1)

We assume that the killing efficiency of tumor cells by CD8<sup>+</sup> T cells is suppressed by IL-35 and that the proliferation rate of tumor cells is enhanced by IL-35. Accordingly in Equation (1), we choose smaller killing rate  $\eta_c$  [55,56] and larger proliferation rate  $\lambda_1$  of tumor cells than in [22,55]. For simplicity, we take all cells to have the same diffusion coefficient,  $D_c = D_M = D_R = D_T = D_e$ , with  $D_e = 4.32 \times 10^{-6} \text{ cm}^2/\text{day}$  by [22,25,57].

### Estimate $c_M$ in Equation (3)

From Figures two B and three B in [1], we deduce that  $I_{35}$  grows slowly in time, and

$$I_{35}(0) \approx 1.8 \times 10^5 \text{ pg/cm}^3 \text{ and } I_{35}(15) \approx 5.6 \times 10^5 \text{ pg/cm}^3. \quad (18)$$

We take  $c_M = 10^6 \text{ pg/cm}^3$  so that on the average  $\frac{I_{35}}{I_{35} + c_M} \approx \frac{1}{5}$ , for  $0 < t < 15$  days.

### Estimate $\sigma_0$ , $\sigma_1$ , and $\alpha_M$ in Equation (3)

In order to estimate  $\sigma_1$ , we use simplified forms of Equation (3):

$$\frac{dM}{dt} = \sigma_0 + \alpha_M \times \frac{qM_0}{\sigma_M + q} - \mu_M M, \quad (19)$$

$$\frac{d\tilde{M}}{dt} = \sigma_0 + \sigma_1 M_0 \times \frac{I_{35}}{I_{35} + c_M} + \alpha_M \times \frac{qM_0}{\sigma_M + q} - \mu_M \tilde{M}, \quad (20)$$

for J558-Ctrl tumor cells and J558-IL-35 tumor cells, respectively. Taking the difference and recalling that on the average  $\frac{I_{35}}{I_{35} + c_M} \approx \frac{1}{5}$  for  $0 < t < 15$ , we get, with  $\mu_M = 0.03/\text{day}$  [58,59],



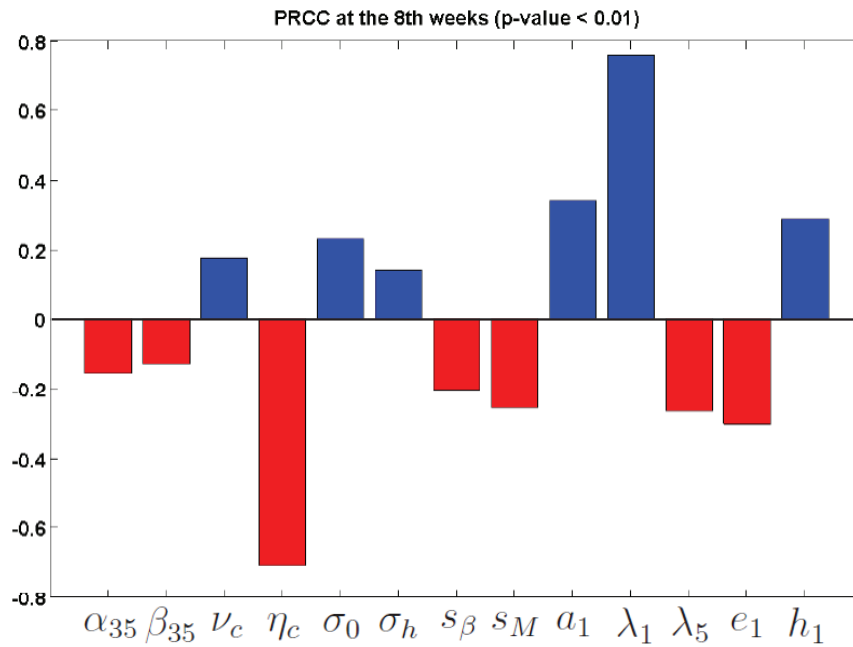

**Figure 5. Sensitivity analysis.** PRCC values at the second months for the parameters in Table 14 with p-value smaller than 0.01. doi:10.1371/journal.pone.0110126.g005

$$\tilde{M}(15) - M(15) = (\tilde{M}(0) - M(0))e^{-0.45} + \frac{\sigma_1 M_0}{5\mu_M}(1 - e^{-0.45})$$

and the first term of the right-hand side may be neglected since initially the density of MDSC is small [1]. From Figure five A in [1], we deduce that

$$\begin{aligned} \tilde{M}(15) &\approx 18 \times 10^6 \text{ cell/cm}^3/\text{day} \text{ and} \\ M(15) &\approx 9 \times 10^6 \text{ cell/cm}^3/\text{day}. \end{aligned} \tag{21}$$

Since  $M_0 = 8000 \text{ cell/cm}^3$  [56,58], we get

$$\begin{aligned} \sigma_1 &= \frac{5}{8000 \text{ cell/cm}^3} \times \frac{0.03/\text{day} \times 9 \times 10^6 \text{ cell/cm}^3}{1 - e^{-0.45}} \\ &\approx 465.518/\text{day}. \end{aligned}$$

We assume that, due to the secretion of IL-35, the production of MDSC in the present model is larger than the production assumed in [56], so we have taken  $\sigma_0$  and  $\alpha_M$  to be larger than in [56].

**Estimate  $D_{I_{35}}$  and  $\mu_{35}$  in Equation (4)**

Since IL-35 belongs to the IL-12 family, we assume that its diffusion coefficient and its degradation rate are the same as for IL-12 [60–63]:

$$D_{I_{35}} = 1.25 \times 10^{-3} \text{ cm}^2/\text{day},$$

$$\mu_{35} = 2/\text{day}.$$

**Estimate  $\alpha_{35}$ ,  $\beta_{35}$ ,  $\gamma_{35}$  in Equation (4)**

In order to find  $\alpha_{35}$  for the J558-IL-35 mouse model, we use the simplified version of Equation (4) where only cancer cells produce  $I_{35}$ , i.e.,  $R = 0$  and  $M = 0$  :

$$\frac{dI_{35}(t)}{dt} = \alpha_{35}c - \mu_{35}I_{35}(t). \tag{22}$$

If  $c$  is taken to be a constant, then

$$I_{35}(t) = e^{-\mu_{35}t}I_{35}(0) + \frac{\alpha_{35}c}{\mu_{35}}(1 - e^{-\mu_{35}t}). \tag{23}$$

In the *in vivo* experiments of Wang et al. [1] the initial number of cancer cells that were injected was  $5 \times 10^6$  and we assume that they occupy a volume of  $50 \text{ mm}^3$ , so that

$$c(0) = 10^8 \text{ cell/cm}^3. \tag{24}$$

There is no data in [1] on the density of the tumor cells in day 15, but the tumor cells were observed to grow rapidly in the first 15 days. We assume that the average of the density of tumor cells in the first 15 days is very close to the maximal capacity  $10^9 \text{ cell/cm}^3$  and take, in (23),  $c = 10^9 \text{ cell/cm}^3$  for J558-IL-35 tumor cells. Recalling Equation (18), we get, with  $\mu_{35} = 2/\text{day}$  (Table 4),

$$5.6 \times 10^5 \text{ pg/cm}^3 \approx e^{-15 \text{ day} \times 2/\text{day}} \times 1.8 \times 10^5 \text{ pg/cm}^3$$

$$+ \frac{\alpha_{35}}{2/day} \times 10^9 \text{ cell/cm}^3 \times (1 - e^{-15 \text{ day} \times 2/day}),$$

so that  $\alpha_{35} \approx 10^{-3} \text{ pg/cell/day}$  for J558-IL-35 mouse model.

In contrast to the case of J558-IL-35 mouse model, in J558-Ctrl mouse  $I_{35}$  is mainly secreted by  $T_{\text{regs}}$  [11,13,14,27], little by MDSCs, and very little by tumor cells. Hence, in the J558-Ctrl case, we take the production rate of  $I_{35}$  by tumor cells to be  $\alpha_{35} = 10^{-7} \text{ pg/cell/day}$ .

The production rate of  $I_{35}$  by  $T_{\text{reg}}$  is estimated to be  $\beta_{35} = 1.67 \times 10^{-3} \text{ pg/cell/day}$  [34] and we take the production rate of  $I_{35}$  by MDSCs to be small enough, i.e.,  $\gamma_{35} = 10^{-4} \text{ pg/cell/day}$ , so that the production of  $I_{35}$  in the J558-IL-35 case satisfies:

$$\alpha_{35}c \gg \beta_{35}R \gg \gamma_{35}M,$$

and production of  $I_{35}$  in J558-Ctrl case satisfies:

$$\beta_{35}R \gg \gamma_{35}M \gg \alpha_{35}c.$$

### Estimate $\delta_M, \delta_\beta, \sigma_R, \sigma_\beta$ in Equation (5)

In [38], the cytokine signalling by TGF- $\beta$  on  $T_{\text{reg}}$  is modeled by

$$\tilde{\delta}_\beta \frac{I_\beta}{I_\beta + \tilde{\sigma}_\beta}, \quad (25)$$

where  $\tilde{\delta}_\beta = 33.27/day$  which has dimension per day and  $\tilde{\sigma}_\beta = 1$  which is nondimension. In our Equation (5), the dimension of  $\delta_\beta$  is  $\text{cell/cm}^3/day$  and the dimension of  $\sigma_\beta$  is  $\text{pg/cm}^3$ . Correspondingly, we take

$$\delta_\beta = \tilde{\delta}_\beta \times R_0 = 33.27/day \times 10^5 \text{ cell/cm}^3 =$$

$$3.327 \times 10^6 \text{ cell/cm}^3/day,$$

$$\sigma_\beta = \tilde{\sigma}_\beta \times I_\beta^0 = 1 \times 2.4 \times 10^3 \text{ pg/cm}^3 = 2.4 \times 10^3 \text{ pg/cm}^3,$$

where  $I_\beta^0 \approx 2.4 \times 10^3 \text{ pg/cm}^3$  [64].

MDSC also activates  $T_{\text{reg}}$  population. We assume that the activation of  $T_{\text{reg}}$  by MDSC is weaker than the activation of  $T_{\text{reg}}$  by TGF- $\beta$ , and hence take it to be

$$\delta_M = \frac{3}{8} \delta_\beta \approx 1.25 \times 10^6 \text{ cell/cm}^3/day.$$

We also take  $\sigma_R = 10^7 \text{ cell/cm}^3$ .

## References

- Wang Z, Liu JQ, Liu Z, Shen R, Zhang G, et al. (2013) Tumor-derived il-35 promotes tumor growth by enhancing myeloid cell accumulation and angiogenesis. *J Immuno* 190: 2415–2423.
- Zeng JC, Zhang Z, Li TY, Liang YF, Wang HM, et al. (2013) Assessing the role of il-35 in colorectal cancer progression and prognosis. *Int J Clin Exp Pathol* 6: 1806–1816.
- Long J, Zhang X, Wena M, Kong Q, Lv Z, et al. (2013) Il-35 over-expression increases apoptosis sensitivity and suppresses cell growth in human cancer cells. *Biochemical and Biophysical Research Communications* 430: 364–369.
- Liyanage UK, Moore TT, Joo HG, Tanaka Y, Herrmann V, et al. (2002) Prevalence of regulatory t cells is increased in peripheral blood and tumor microenvironment of patients with pancreas or breast adenocarcinoma. *J Immunol* 169: 2756–2761.
- Wolf D, Wolf AM, Rumpold H, Fiegl H, Zeimet AG, et al. (2005) The expression of the regulatory t cell-specific forkhead box transcription factor foxp3 is associated with poor prognosis in ovarian cancer. *Clin Cancer Res* 11: 8326–8331.

### Estimate $v_c$ and $v_R$ in Equation (6)

We assume as before that the initial tumor occupies a volume of  $50 \text{ mm}^3$  and, accordingly, also  $T_{\text{reg}}$  occupies the same volume. In [34], the production of  $I_\beta$  by tumor cells and  $T_{\text{regs}}$  are  $1.1 \times 10^{-4} \frac{\text{pg}}{\text{day} \cdot \text{cell}} \times \frac{1}{\text{cm}^3}$  and  $1.8 \times 10^{-5} \frac{\text{pg}}{\text{day} \cdot \text{cell}} \times \frac{1}{\text{cm}^3}$ , respectively. Hence,

$$v_R = 1.8 \times 10^{-5} \frac{\text{pg}}{\text{day} \cdot \text{cell}} \times \frac{1}{\text{cm}^3} \times 50 \text{ mm}^3 = 9 \times 10^{-7} \text{ pg/cell/day},$$

$$v_c = 1.1 \times 10^{-4} \frac{\text{pg}}{\text{day} \cdot \text{cell}} \times \frac{1}{\text{cm}^3} \times 50 \text{ mm}^3 = 5.5 \times 10^{-6} \text{ pg/cell/day}.$$

### Estimate $s_M, \beta_1, \beta_2, a_1, a_2, a_3, c_5$ in Equation (7)

Since IL-35 enhances the population of MDSC, the concentration of IL-10, which we represent by  $a_1M$ , is larger than the one in [56]. Hence, we chose  $s_M$  to be larger than the corresponding value of  $s_M$  in [56]. Moreover, since IL-35 promotes tumor growth, we expect a stronger immune response by T cells than in [56] and hence we take  $\beta_1$  and  $\beta_2$  larger than the corresponding value in [56]. The parameter  $c_5$  is taken from [56]. Since the chemotaxis and activation of  $\text{CD8}^+$  T cells are indirect, we take  $a_2$  and  $a_3$  to be smaller than  $a_1$ :  $a_1 = 2 \text{ pg/cell}$  and  $a_2 = a_3 = 0.01 \text{ pg/cell}$ .

### Estimate $k_1, k_2, \sigma_h, \lambda_5, w_*$ in Equation (8)

We take  $\sigma_h$  to be the average of the concentration of IL-35 at times 0 and 15 days, so that  $\sigma_h = 3.7 \times 10^5 \text{ pg/cm}^3$  by Equation (18). We assume that the productions of VEGF by tumor cells and MDSCs are small when there are no IL-35 and M-CSF, respectively, so we set  $k_1 = 3.7 \times 10^2 \text{ pg/cm}^3$  and  $k_2 = 10 \text{ pg/cm}^3$ . Since in [1]  $I_{35}$  increases the concentration of VEGF significantly, we take  $\lambda_5$  to be larger than the value in [56]. We also slightly modify the parameter value  $w_*$  and function  $\phi$  used in [56].

### Estimate $D_e, k_h, \lambda_{12}, e_1, h_0,$ and $h_1$ in Equation (9)

We take values similar to those in [22,55].

### Estimate $\lambda_8, \lambda_9,$ and $\lambda_{10}$ in Equation (10)

We assume that  $\text{CD8}^+$  T cells, MDSCs, and  $T_{\text{regs}}$  have the same consumption rates of oxygen, so we take  $\lambda_8 = \lambda_9 = \lambda_{10} = 1.61568 \times 10^{-8} \text{ cm}^3/\text{cell/day}$  [55,56,65].

## Author Contributions

Conceived and designed the experiments: KL XB AF. Performed the experiments: KL XB AF. Analyzed the data: KL XB AF. Contributed reagents/materials/analysis tools: KL XB AF. Wrote the paper: KL XB AF.

6. Strauss L, Bergmann C, Szczepanski M, Gooding W, Johnson JT, et al. (2007) A unique subset of  $cd4^+cd25^{high}foxp3^+$  t cells secreting interleukin-10 and transforming growth factor- $\beta$ 1 mediates suppression in the tumor microenvironment. *Clinical Cancer Research* 13: 4345–4354.
7. Eller K, Wolf D, Huber JM, Metz M, Mayer G, et al. (2011) Il-9 production by regulatory t cells recruits mast cells that are essential for regulatory t cell-induced immune suppression. *J Immunology* 186: 83–91.
8. Collison LW, Workman CJ, Kuo TT, Boyd K, Wang Y, et al. (2007) The inhibitory cytokine il-35 contributes to regulatory t-cell function. *Nature* 450: 566–569.
9. Collison LW, Vignali DAA (2008) Interleukin-35: odd one out or part of the family? *Immunol Rev* 226: 248–262.
10. Vignali DAA, Collison LW, Workman CJ (2008) How regulatory t cells work. *Nat Rev Immunol* 8: 523–532.
11. Xu M, Mizoguchi I, Morishima N, Chiba Y, Mizuguchi J, et al. (2010) Regulation of antitumor immune responses by the il-12 family cytokines, il-12, il-23, and il-27. *Clinical and Developmental Immunology* 14: 832454.
12. Chaturvedi V, Collison LW, Guy CS, Workman CJ, Vignali DAA (2011) Human regulatory t cells require interleukin-35 to mediate suppression and infectious tolerance. *J Immunol* 186: 6661–6666.
13. Collison LW, Delgoffe GM, Guy CS, Vignali KM, Chaturvedi V, et al. (2012) The composition and signaling of the il-35 receptor are unconventional. *Nature immunology* 13: 290–299.
14. Vignali DAA, Kuchroo VK (2012) Il-12 family cytokines: immunological playmakers. *Nature immunology* 13: 722–728.
15. Collison LW, Chaturvedi V, Henderson AL, Giacomin PR, Guy C, et al. (2010) Il-35-mediated induction of a potent regulatory t cell population. *Nat Immunol* 11: 1093–1101.
16. Nishino R, Takano A, Oshita H, Ishikawa N, Akiyama H, et al. (2011) Identification of epstein-barr virus-induced gene 3 as a novel serum and tissue biomarker and a therapeutic target for lung cancer. *Clin Cancer Res* 17: 6272–6286.
17. Larousserie F, Bardel E, Pflanz S, Arnulf B, Lome-Maldonado C, et al. (2005) Analysis of interleukin-27 (eb13/p28) expression in epstein-barr virus- and human t-cell leukemia virus type 1-associated lymphomas: heterogeneous expression of eb13 subunit by tumoral cells. *Am J Pathol* 166: 1217–1228.
18. Niedobitek G, Paolt D, Teichmann M, Devergne O (2002) Frequent expression of the epstein-barr virus (ebv)-induced gene, eb13, an il-12 p40-related cytokine, in hodgkin and reed-sterneberg cells. *J Pathol* 198: 310–316.
19. Gabrilovich DI, Rosenberg SO, Bronte V (2012) Coordinated regulation of myeloid cells by tumors. *Nat Rev Immunol* 12: 253–268.
20. Yang WC, Ma G, Chen SH, Pan PY (2013) Polarization and reprogramming of myeloid-derived suppressor cells. *J Mol Cell Biol* 5: 207–209.
21. Kendall M (1998) Dying to live: How our bodies fight disease. Cambridge University.
22. Szomolay B, Eubank TD, Roberts RD, Marsh CB, Friedman A (2012) Modeling the inhibition of breast cancer growth by gm-csf. *J Theoret Biol* 303: 141–151.
23. Lewis JS, Lee JA, Underwood JCE, Harris AL, Lewis CE (1999) Macrophage responses to hypoxia: relevance to disease mechanisms. *J Leuk Biol* 66: 889–900.
24. Mantovani A, Sica A, Sozzani S, Allavena P, Vecchi A, et al. (2004) The chemokine system in diverse forms of macrophage activation and polarization. *Trends Immunol* 25: 677–686.
25. Owen MR, Byrne HM, Lewis CE (2004) Mathematical modeling of the use of macrophages as vehicles for drug delivery to hypoxic tumor sites. *J Theoret Biol* 226: 377–391.
26. Sica A, Schioppa T, Mantovani A, Allavena P (2006) Tumour-associated macrophages are a distinct m2 polarised population promoting tumour progression: Potential targets of anti-cancer therapy. *European J of Cancer* 42: 717–727.
27. Morishima N, Mizoguchi I, Okumura M, Chiba Y, Xu M, et al. (2010) A pivotal role for interleukin-27 in  $cd8^+$  t cell functions and generation of cytotoxic t lymphocytes. *J Biomedicine and Biotechnology*: doi:10.1155/2010/605483.
28. Baek HJ, Kim SS, da Silva FM, Volpe EA, Evans S, et al. (2006) Inactivation of tgf-beta signaling in lung cancer results in increased cdk4 activity that can be rescued by elf. *Biochem Biophys Res Commun* 11: 1150–1157.
29. Colombo MP, Piconese S (2007) Regulatory t-cell inhibition versus depletion: the right choice in cancer immunotherapy. *Nature Reviews Cancer* 7: 880–887.
30. Danforth DNJ, Sgagias MK (1996) Tumor necrosis factor alpha enhances secretion of transforming growth factor beta2 in mcf-7 breast cancer cells. *Clin Cancer Res* 2: 827–835.
31. Kretzschmar M (2000) Transforming growth factor-beta and breast cancer: transforming growth factor-beta/smad signaling defects and cancer. *Breast Cancer Res* 2: 107–115.
32. Massagué J (1998) Tgf-beta signal transduction. *Annu Rev Biochem* 67: 753–791.
33. Muller AJ, Scherle PA (2006) Targeting the mechanisms of tumoral immune tolerance with small-molecule inhibitors. *Nat Rev Cancer* 6: 613–625.
34. Robertson-Tessi M, El-Kareh A, Goriely A (2011) A mathematical model of tumor-immune interactions. *Journal of Theoretical Biology* 10: 294–273.
35. Truty MJ, Urrutia R (2007) Basics of tgf-beta and pancreatic cancer. *Pancreatol* 7: 423–435.
36. Tran DQ (2012) Tgf- $\beta$ : the sword, the wand, and the shield of  $foxp3^+$  regulatory t cells. *J Mol Cell Biol* 4: 29–37.
37. Kullberg MC, Hay V, Cheever AW, Mamura M, Sher A, et al. (2005) Tgf-beta1 production by  $cd4^+cd25^+$  regulatory t cells is not essential for suppression of intestinal inflammation. *Eur J Immunol* 35: 2886–2895.
38. LoWC, Arsenescu RI, Friedman A (2013) Mathematical model of the roles of t cells in inflammatory bowel disease. *Bull Math Biol* 75: 1417–1433.
39. Boelte KC, Gordy LE, Joyce S, Thompson MA, Yang L, et al. (2011) Rgs2 mediates pro-angiogenic function of myeloid derived suppressor cells in the tumor microenvironment via upregulation of mcp-1. *PLoS ONE* 11: e18534.
40. Kross KW, Heimdal JH, Olsnes C, Olofson J, Aarstad HJ (2007) Tumor-associated macrophages secrete il-6 and mcp-1 in head and neck squamous cell carcinoma tissue. *Acta Otolaryngol* 127: 532–539.
41. Robertson MJ, Ritz J (1996) Interleukin 12: basic biology and potential applications in cancer treatment. *Oncologist* 1: 88–97.
42. Lai YP, Jeng CJ, Chen SC (2011) The roles of  $cd4^+$  t cells in tumor immunity. *ISRN Immunology* 2011: doi:10.5402/2011/497397.
43. Wagner H, Kronke M, Solbach W, Scheurich P, Rollinghoff M, et al. (1982) Murine t cell subsets and interleukins: relationships between cytotoxic t cells, helper t cells and accessory cells. *Clin Haematol* 11: 607–630.
44. Tiemessen MM, Kunzmann S, Schmidt-Weber CB, Garsen J, Buijnzel-Koomen CA, et al. (2003) Transforming growth factor-beta inhibits human antigen-specific  $cd4^+$  t cell proliferation without modulating the cytokine response. *Int Immunol* 15: 1495–1504.
45. Quatromoni JG, Suzuki E, Okusanya O, Judy BF, Bhojnarwala P, et al. (2013) The timing of tgf- $\beta$  inhibition affects the generation of antigen-specific  $cd8^+$  t cells. *BMC Immunol* 17: doi: 10.1186/1471-2172-14-30.
46. Thomas DA, Massagué J (2005) Tgf- $\beta$  directly targets cytotoxic t cell functions during tumor evasion of immune surveillance. *Cancer Cell* 8: 369–380.
47. Eubank TD, Roberts RD, Khan M, Curry JM, Nuovo GJ, et al. (2009) Granulocyte macrophage colony-stimulating factor inhibits breasts growth and metastasis by invoking an anti-angiogenic program in tumor-educated macrophages. *Cancer Res* 69: 2133–2140.
48. Lin Y, Huang Y, Lu Z, Luo C, Shi Y, et al. (2012) Decreased plasma il-35 levels are related to the left ventricular ejection fraction in coronary artery diseases. *PLoS ONE* 7: e52490.
49. Marino S, Hogue IB, Ray CJ, Kirschner DE (2008) A methodology for performing global uncertainty and sensitivity analysis in systems biology. *J Theor Biol* 254: 178–196.
50. Nicholl MB, Ledgewood CL, Chen X, Bai Q, Qin C, et al. (2014) Il-35 promotes pancreas cancer growth through enhancement of proliferation and inhibition of apoptosis: Evidence for a role as an autocrine growth factor. *Cytokine*: in press.
51. Jarnicki A, Lysaght J, Todryk S, Mills K (2006) Suppression of antitumor immunity by il-10 and tgf- $\beta$ -producing t cells infiltrating the growing tumor: influence of tumor environment on the induction of  $cd4^+$  and  $cd8^+$  regulatory t cells. *J Immunol* 177: 896–904.
52. Maynard CL, Harrington LE, Janowski KM, Oliver JR, Zindl CL, et al. (2007) Regulatory t cells expressing interleukin 10 develop from  $foxp3^+$  and  $foxp3^0$  precursor cells in the absence of interleukin 10. *Nature immunology* 8: 931–941.
53. Putheti P, Awasthi A, Popoola J, Gao W, Strom TB (2010) Human  $cd4^+$  memory t cells can become  $cd4^+il-9^+$  t cells. *PLoS ONE* 5: e8706.
54. Schmitt EG, Haribhai D, Williams JB, Aggarwal P, Jia S, et al. (2012) Il-10 produced by induced regulatory t cells (itregs) controls colitis and pathogenic ex- itregs during immunotherapy. *J Immunol* 189: 5638–5648.
55. Chen D, Roda JM, Marsh CB, Eubank TD, Friedman A (2012) Hypoxia inducible factors mediate the inhibition of cancer by gm-csf: a mathematical model. *Bull Math Biol* 17: 2752–2777.
56. Liao KL, Bai XF, Friedman A (2013) The role of  $cd200$ - $cd200r$  in tumor immune evasion. *J Theor Biol* 328: 65–76.
57. Plank MJ, Sleeman BD, Jones PF (2004) A mathematical model of tumor angiogenesis, regulated by vascular endothelial growth factor and the angiopoietins. *J Theor Biol* 229: 435–454.
58. Day J, Friedman A, Schlesinger LS (2008) Modeling the immune rheostat of macrophages in the lung in response to infection. *PNAS* 106: 11246–11251.
59. Freeman BJ, Roberts MS, Vogler CA, Nicholes A, Hofling AA, et al. (1999) Behavior and therapeutic efficacy of  $\beta$ -glucuronidase-positive mononuclear phagocytes in murine model of mucopolysaccharidosis type vii. *Blood* 94: 2142–2150.
60. DiLeo MV, Kellum JA, Federspiel WJ (2009) A simple mathematical model of cytokine capture using a hemoabsorption device. *Ann Biomed Eng* 37: 222–229.
61. Sánchez-Hernández C, Gutiérrez-Ortega A, Aguilar-León D, Hernández-Pando R, Gómez-Lim M, et al. (2010) In vivo activity of plant-based interleukin-12 in the lung of balb/c mouse. *BMC Research Notes* 3: doi: 10.1186/1756-0500-3-151.
62. Lee SM, Suen Y, Chang L, Bruner V, Qian J, et al. (1995) Decreased interleukin-12 (il-12) from activated cord versus adult peripheral blood mononuclear cells and upregulation of interferongamma, natural killer, and lymphokine-activated killer activity by il-12 in cord blood mononuclear cells. *Blood* 88: 945–954.
63. Robertson MJ, Cameron C, Atkins MB, Gordon MS, Lotze MT, et al. (1999) Immunological effects of interleukin 12 administered by bolus intravenous injection to patients with cancer. *Clin Cancer Res* 5: 9–16.
64. Todorović-Raković N, Ivanović V, Demajó M, Nešković-Konstantinovi Z, Nikolić-Vukosavljević D (2003) Elevated plasma levels of tgf-beta1 in patients with locally advanced breast cancer related to other clinical stages. *Archive of Oncology* 11: 131–133.

65. Youn BS, Sen A, Behie LA, Girgis-Gabardo A, Hassell JA (2008) Scale-up of breast cancer stem cell aggregate cultures to suspension bioreactors. *Biotechnol Prog* 22: 801–810.
66. Breward CJW, Byrne HM, Lewis CE (2001) Modeling the interactions between tumor cells and a blood vessel in a microenvironment within a vascular tumor. *European J Appl Math* 12: 529–556.
67. Qian B, Deng Y, Hong Im J, Muschel RJ, Zou Y, et al. (2009) A distinct macrophage population mediated metastatic breast cancer cell extravasation, establishment and growth. *PLoS ONE* 4: e6563.
68. Vaupel P, Mayer A, Briest S, Höckel M (2003) Oxygenation gain factor: a novel parameter characterizing the association between hemoglobin level and the oxygenation status of breast cancers. *Cancer Res* 63: 7634–7637.
69. Casciari JJ, Sotirchos SV, Sutherland RM (1988) Glucose diffusivity in multicellular tumor spheroids. *Cancer Res* 48: 3905–3909.
70. Owen MR, Sherratt JA (1998) Pattern formation and spatiotemporal irregularity in a model for macrophage tumor interactions. *J Theor Biol* 189: 63–80.
71. Oren H, Duman N, Abacioglu H, Ozkan H, Irken G (2001) Association between serum macrophage colony-stimulating factor levels and monocyte and thrombocyte counts in healthy, hypoxic, and septic term neonates. *Pediatrics* 108: 329–332.
72. Utting JC, Flanagan AM, Brandao-Burch A, Orriss IR, Aenett TR (2010) Hypoxia stimulates osteoclast formation from human peripheral blood. *Cell Biochem Funct* 28: 374–380.
73. Tang S, Liu H, Chen G, Rao Q, Geng Y, et al. (2000) Internalization and half-life of membrane-bound macrophage colony-stimulating factor. *Chinese Sc Bull* 45: 1697–1703.
74. Vukmanovic-Stejić M, Zhang Y, Cook J, Fletcher J, McQuaid A, et al. (2006) Human  $cd4^+cd25^{hi}foxp3$  regulatory t cells are derived by rapid turnover of memory populations in vivo. *J Clin Invest* 116: 2423–2433.
75. Yates A, Callard R (2001) Cell death and the maintenance of immunological memory. *Discret Contin Dyn S* 1: 43–59.
76. Kim Y, Friedman A (2010) Interaction of tumor with its micro-environment: a mathematical model. *J Math Biol* 72: 1029–1068.
77. Marino S, Kirschner DE (2004) The human immune response to mycobacterium tuberculosis in lung and lymph node. *J Theor Biol* 227: 463–486.
78. Abe R, Donnelly SC, Peng T, Bucala R, Metz CN (2001) Peripheral blood fibrocytes: differentiation pathway and migration to wound sites. *J Immunol* 166: 7556–7562.
79. Kim Y, Lawler S, Nowicki MO, Chiocca EA, Friedman A (2009) A mathematical model for pattern formation of glioma cells outside the tumor spheroid core. *J Theor Biol* 260: 359–371.
80. Kim Y, Wallace J, Li F, Ostrowski M, Friedman A (2010) Transformed epithelial cells and fibroblasts/myofibroblasts interaction in breast tumor: a mathematical model and experiments. *J Math Biol* 61: 401–421.
81. Hengel RL, Jones BM, Kennedy MS, Hubbard MR, McDougal JS (1999) Markers of lymphocyte homing distinguish cd4 t cell subsets that turn over in response to hiv-1 infection in humans. *J Immunol* 163: 3539–3548.
82. Sachsenberg N, Perelson AS, Yerly S, Schockmel GA, Leduc D, et al. (1998) Turnover of cd4+ and cd8+ t lymphocytes in hiv-1 infection as measured by ki-67 antigen. *J Exp Med* 187: 1295–1303.
83. Sprent J, Basten A (1973) Circulating t and b lymphocytes of the mouse. ii. lifespan. *Cell Immunol* 7: 40–59.
84. Wigginton JE, Kirschner D (2001) A model to predict cell-mediated immune regulatory mechanisms during human infection with mycobacterium tuberculosis. *J Immunol* 166: 1951–1967.
85. Winslow GM, Roberts AD, Blackman MA, Woodland DL (2003) Persistence and turnover of antigen-specific cd4 t cells during chronic tuberculosis infection in the mouse. *J Immunol* 170: 2046–2052.
86. Gabhann FM, Popel AS (2003) Model of competitive binding of vascular endothelial growth factor and placental growth factor to vegf receptors on endothelial cells. *Am J Physiol Heart Circ Physiol* 286: H153–H164.
87. Schugart RC, Friedman A, Zhao R, Sen CK (2008) Wound angiogenesis as a function of tissue oxygen tension: a mathematical model. *PNAS* 105: 2628–2633.
88. Chaplain MAJ, Giles SM, Sleeman BD, Jarvis RJ (1995) Amathematical analysis of a model for tumour angiogenesis. *J Math Biol* 33: 744–770.
89. Eubank TD, Roberts R, Galloway M, Wang Y, Cohn DE, et al. (2004) Gm-csf induces expression of soluble vegf receptor-1 from human monocytes and inhibits angiogenesis in mice. *Immunity* 21: 831–842.
90. Chaplain MAJ (1995) The mathematical modeling of tumour angiogenesis and invasion. *Acta Biotheoret* 43: 387–402.
91. Butterworth AE, Cater DB (1967) Effect of lysolecithin on oxygen uptake of tumor cells polymorphonuclear leucocytes lymphocytes and macrophages in vitro. *Br J Cancer* 21: 373–389.
92. Chen Y, Cairns R, Papandreou I, Koong A, Denko NC (2009) Oxygen consumption can regulate the growth of tumors, a new perspective on the warburg effect. *PLoS ONE* 4: e7033.
